# Supplementary material for: Socioeconomic status and vitamin D deficiency among women of childbearing age: a population-based, case–control study in rural northern China
Source: PubMed Central journal article supplement — BMJ Open. 2021 Mar 22;11(3):e042227. doi: 10.1136/bmjopen-2020-042227 (PMC7986774; doi:10.1136/bmjopen-2020-042227), 2021-03-22
Supplement: bmjopen-2020-042227.draft_revisions.pdf [file bmjopen-2020-042227.draft_revisions.pdf]

# BMJ Open

BMJ Open is committed to open peer review. As part of this commitment we make the peer review history of every article we publish publicly available.

When an article is published we post the peer reviewers' comments and the authors' responses online. We also post the versions of the paper that were used during peer review. These are the versions that the peer review comments apply to.

The versions of the paper that follow are the versions that were submitted during the peer review process. They are not the versions of record or the final published versions. They should not be cited or distributed as the published version of this manuscript.

BMJ Open is an open access journal and the full, final, typeset and author-corrected version of record of the manuscript is available on our site with no access controls, subscription charges or pay-per-view fees (<http://bmjopen.bmj.com>).

If you have any questions on BMJ Open's open peer review process please email [info.bmjopen@bmj.com](mailto:info.bmjopen@bmj.com)

# BMJ Open

## Socio-economic status and vitamin D deficiency among women at childbearing age: a population-based case-control study in rural northern China

|                               |                                                                                                                                                                                                                                                                                                                                                                                                                                                                                                                                                                                   |
|-------------------------------|-----------------------------------------------------------------------------------------------------------------------------------------------------------------------------------------------------------------------------------------------------------------------------------------------------------------------------------------------------------------------------------------------------------------------------------------------------------------------------------------------------------------------------------------------------------------------------------|
| Journal:                      | <i>BMJ Open</i>                                                                                                                                                                                                                                                                                                                                                                                                                                                                                                                                                                   |
| Manuscript ID                 | bmjopen-2020-042227                                                                                                                                                                                                                                                                                                                                                                                                                                                                                                                                                               |
| Article Type:                 | Original research                                                                                                                                                                                                                                                                                                                                                                                                                                                                                                                                                                 |
| Date Submitted by the Author: | 29-Jun-2020                                                                                                                                                                                                                                                                                                                                                                                                                                                                                                                                                                       |
| Complete List of Authors:     | Lin, Shiqi; Peking University, Institute of Population Research<br>Zhang, Yuan; Peking University, Institute of Population Research<br>Li, Jiajia; Peking University, Institute of Population Research<br>Chen, Gong; Institute of Population Research, Peking University,<br>Jiang, Lifang; National Health Commission Key Laboratory of Birth Defects Prevention<br>Chai, Jian; National Health Commission Key Laboratory of Birth Defects Prevention<br>Song, Xinming; Peking University<br>Pei, Lijun; Peking University, Institute of Population Research, Peking University |
| Keywords:                     | NUTRITION & DIETETICS, PUBLIC HEALTH, SOCIAL MEDICINE                                                                                                                                                                                                                                                                                                                                                                                                                                                                                                                             |
|                               |                                                                                                                                                                                                                                                                                                                                                                                                                                                                                                                                                                                   |

SCHOLARONE™  
Manuscripts

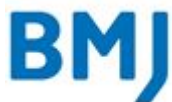

I, the Submitting Author has the right to grant and does grant on behalf of all authors of the Work (as defined in the below author licence), an exclusive licence and/or a non-exclusive licence for contributions from authors who are: i) UK Crown employees; ii) where BMJ has agreed a CC-BY licence shall apply, and/or iii) in accordance with the terms applicable for US Federal Government officers or employees acting as part of their official duties; on a worldwide, perpetual, irrevocable, royalty-free basis to BMJ Publishing Group Ltd ("BMJ") its licensees and where the relevant Journal is co-owned by BMJ to the co-owners of the Journal, to publish the Work in this journal and any other BMJ products and to exploit all rights, as set out in our [licence](#).

The Submitting Author accepts and understands that any supply made under these terms is made by BMJ to the Submitting Author unless you are acting as an employee on behalf of your employer or a postgraduate student of an affiliated institution which is paying any applicable article publishing charge ("APC") for Open Access articles. Where the Submitting Author wishes to make the Work available on an Open Access basis (and intends to pay the relevant APC), the terms of reuse of such Open Access shall be governed by a Creative Commons licence – details of these licences and which [Creative Commons](#) licence will apply to this Work are set out in our licence referred to above.

Other than as permitted in any relevant BMJ Author's Self Archiving Policies, I confirm this Work has not been accepted for publication elsewhere, is not being considered for publication elsewhere and does not duplicate material already published. I confirm all authors consent to publication of this Work and authorise the granting of this licence.

1  
2  
3 **Socio-economic status and vitamin D deficiency among women at childbearing**  
4 **age: a population-based case-control study in rural northern China**  
5

6  
7 Shiqi Lin<sup>1, #</sup>, Yuan Zhang<sup>1, #</sup>, Jiajia Li<sup>1, #</sup>, Gong Chen<sup>1</sup>, Lifang Jiang<sup>2</sup>, Jian Chai<sup>2</sup>,  
8 Xinming Song<sup>1, \*</sup>, Lijun Pei<sup>1, \*</sup>  
9

10  
11  
12 <sup>1</sup>Institute of Population Research/China Center on Population Health and development,  
13 Peking University, Beijing, 100871, China.

14  
15 <sup>2</sup> National Health Commission Key Laboratory of Birth Defects Prevention, Henan  
16 Key Laboratory of Population Defects Prevention, Zhengzhou, 450002, China.  
17

18  
19 **# Shiqi Lin, Yuan Zhang and Jiajia Li contributed equally to this work and should**  
20 **be considered co-first authors.**  
21

22  
23 **\* Address correspondence to:**

24  
25 Lijun Pei, [pei\\_lj@pku.edu.cn](mailto:pei_lj@pku.edu.cn). Xinming Song, [Xmsong@pku.edu.cn](mailto:Xmsong@pku.edu.cn).

26  
27 Institute of Population Research, Peking University, No.5 Yiheyuan Road, Haidian  
28 District, Beijing 100871, China. +86 010-62751974  
29

30 **Emails of all authors:**

31 Shiqi Lin: [linshiqi@pku.edu.cn](mailto:linshiqi@pku.edu.cn);

32 Yuan Zhang: [zyzyzhangyuan@pku.edu.cn](mailto:zyzyzhangyuan@pku.edu.cn);

33 Jiajia Li: [lijiajia95@pku.edu.cn](mailto:lijiajia95@pku.edu.cn);

34 Gong Chen: [chengong@pku.edu.cn](mailto:chengong@pku.edu.cn)

35 Lifang Jiang: [jiangzz66@163.com](mailto:jiangzz66@163.com)

36 Jian Chai: [stopdo@163.com](mailto:stopdo@163.com)

37 Xinming Song, [Xmsong@pku.edu.cn](mailto:Xmsong@pku.edu.cn)

38 Lijun Pei: [pei\\_lj@pku.edu.cn](mailto:pei_lj@pku.edu.cn).  
39  
40  
41  
42

43 **Word count:** 2851  
44  
45  
46

47 **Short title:** Socio-economic status and vitamin D deficiency  
48  
49  
50  
51  
52  
53  
54  
55  
56  
57  
58  
59  
60

### Abstract

**Objective:** To explore the association between socio-economic status (SES) and vitamin D deficiency/insufficiency of women at childbearing age in rural northern China.

**Design:** A population-based case-control study was conducted.

**Setting:** Four counties of Henan Province, China from 2009 to 2016.

**Participants:** 1151 non-pregnant healthy women between 18-40 years old were recruited.

**Primary and secondary outcome measures:** Serum 25-hydroxyvitamin D (25(OH)D) levels were measured using High-performance Liquid Chromatography-Tandem Mass Spectrometry. Vitamin D deficiency was defined as serum 25(OH)D <20 ng/mL; vitamin D insufficiency was defined as serum 25(OH)D of 20~30 ng/mL. SES was measured separately by women's and their husbands' education levels and occupations, household income and expenditure, as well as aggregately by SES index constructed with principal components analysis.

**Results:** The median serum 25(OH)D level was 20.90 (13.60-34.60) ng/ml and the prevalence of vitamin D insufficiency and deficiency was 20.16% and 47.80%. After adjusting for confounding and possible mediating factors including diet, lifestyles and health service utilization, household annual income <10000 Yuan was still associated with an increased risk of vitamin D insufficiency (aOR:2.11, 95%CI:1.43-3.12); inadequate household income for expenditure was associated with an elevated risk of vitamin D insufficiency (aOR:1.64, 95%CI:1.10-2.46). Household annual income <10000 Yuan and inadequate household income for expenditure were also associated with elevated risks of vitamin D deficiency (aOR:1.66, 95%CI:1.18-2.34; aOR: 1.92, 95%CI:1.37-2.68). Low SES index was associated with elevated risks of vitamin D insufficiency (aOR: 2.46; 95%CI: 1.57-3.88), while both middle and low SES index were associated with increased risks of vitamin D deficiency (aOR: 1.43, 95%CI: 1.35-2.91; aOR: 1.98, 95%CI: 1.35-2.91).

**Conclusions:** Low SES was associated with higher risks of vitamin D deficiency/insufficiency of women at childbearing age in rural northern China. More efforts should be devoted to explore potential mechanisms and to narrow down SES inequalities in vitamin D status.

**Key words:** socio-economic status, vitamin D insufficiency and deficiency, women at

1  
2  
3  
4 childbearing age, rural northern China  
5

6  
7 **Article summary**  
8

9  
10 **Strengths and limitations of the study:**  
11

12 The data was a population-based and representative one of large sample size with the  
13 information on the main exposures and blood sample obtained at the same time to  
14 minimize recall bias.  
15

16 Both separate dimensions and aggregate index of SES were taken to thoroughly  
17 examine the association between SES and vitamin D status.  
18

19 It's one of the few studies to target women at childbearing age in rural northern China  
20 who were in great need of enough vitamin D both for themselves and for their  
21 offspring but were found to be deficient in vitamin D.  
22

23 The level of serum 25(OH)D might be underestimated because the blood sample of  
24 this study was collected in winter when daylight and temperature was lower than that  
25 in summer.  
26

27 The measurement of diet was based on eating frequencies of different kinds of food,  
28 which might reduce the measurement accuracies and probably leading to  
29 misclassification errors.  
30

## Introduction

Vitamin D deficiency/insufficiency could cause many health problems to all ages, recognized as important risk factors for growth retardation, skeletal deformities and osteoporotic diseases<sup>1</sup>, and is lined to occurrences of a variety of chronic diseases and thus premature mortality worldwide<sup>2</sup>, including China<sup>3</sup>. Since inadequate sunlight exposure and absorption of vitamin D are among the major causes of vitamin D deficiency/insufficiency<sup>1</sup>, a series of studies have indicated vitamin D deficiency/insufficiency follows a gradient of socio-economic status (SES)<sup>4-8</sup>, a crucial factor determining one's lifestyles. Even though SES may not be itself a direct causal factor for health problems, exploring social inequalities of vitamin D deficiency/insufficiency can help to provide clues to the actual mechanisms involved<sup>9</sup>. However, prior studies concerning this topic were most descriptive ones, based mainly on findings from western and West Asian countries where distribution of lifestyles in different SES was very distinct from that in other countries like China. Moreover, previous researches on the association between SES and vitamin D deficiency/insufficiency often focused on elderly and children, seldom on women at childbearing age. Yet the fact that sufficient vitamin D is vital to those women as well as their offspring underscores the need for performing studies in regions like northern rural China where prevalence of vitamin D deficiency/insufficiency was found to be quite higher than that in regions of lower latitude and more developed economy<sup>3</sup>. The aim of our study is to explore the association between SES and vitamin D deficiency/insufficiency among women at childbearing age in rural northern China.

## Materials and methods

### Study design and population

The study was a population-based case-control one. The data was from the Study on Population-based Birth Defects Monitoring and Comprehensive Intervention. The Study was a prospective cohort of women at childbearing age from December 2009 to February 2010 in 4 counties of Henan Province, China to explore exposure risk factors for adverse pregnancy outcomes before and in pregnancy. Women between 18-40 years old who intended to become pregnant, lived in the research counties with permanent

1  
2  
3 residency and didn't have severe heart, liver, kidney, blood or other system diseases or  
4 cancers, were recruited. A total of 1151 women at childbearing age participated in our  
5 research.  
6  
7

### 8 9 **Data collection**

10  
11 Trained healthcare workers conducted face-to-face interviews with participants  
12 and their families at baseline to collect information on the women's and their husbands'  
13 demographic and social economic characteristics, women's history of diseases and  
14 treatment, eating habits and the frequency of dietary and nutrient intake, behavioral  
15 exposure factors and the utilization of public health services.  
16  
17

18  
19 For each participant, a fasting venous blood sample was also collected at baseline  
20 by 8 ml. The sample was prepared by centrifugation and stored at -80°C until analysis..  
21  
22

23  
24 The study protocol was reviewed and approved by Institutional Review Board of  
25 Peking University Health Science Center, and written informed consent was obtained  
26 from all subjects before completing the questionnaire and collection of blood samples  
27 at the time of the baseline survey.  
28  
29

### 30 31 **Definitions of vitamin D insufficiency and deficiency**

32  
33 Serum 25-hydroxyvitamin D (25(OH)D) levels of the 1151 women's blood  
34 samples were measured using High-performance Liquid Chromatography-Tandem  
35 Mass Spectrometry (HPLC-MS/MS, Ultimate3000 - API 3200 Q TRAP). Vitamin D  
36 deficiency was defined as serum 25(OH)D <20 ng/mL, vitamin D insufficiency as  
37 serum 25(OH)D 20~30 ng/mL<sup>10</sup>.  
38  
39

### 40 41 **Definitions of socio-economic status**

42  
43 In our study, SES was measured by both separate and aggregate indicators. There  
44 were six separate dimensions of SES: women's education level, their husbands'  
45 education level, women's occupation, their husbands' occupation, household annual  
46 income and whether their annual income was enough for expenditure. Aggregating over  
47 these six dimensions of SES, we further constructed an SES index using principle  
48 components analysis. To make the categorical form of data meet the requirement of  
49 principle components analysis, all the six categorical variables were coded into binary  
50 ones. Since all data have an equal weight, the co-variance matrix was used and the  
51  
52  
53  
54  
55  
56  
57  
58  
59  
60



1  
2  
3  
4 Bartlett's test of sphericity was statistically significant ( $P < 0.001$ ), indicating it suitable  
5 to use principle components analysis here. The first principal component was taken as  
6 a measure of SES index<sup>11</sup>, accounting for 29% of total variation. This percentage,  
7 though seemed not high, was in accordance with previous studies<sup>12</sup>, reflecting that  
8 correlations between variables were complex and that each variable may have its own  
9 determinant other than SES<sup>11</sup>. The SES index was then divided into three groups: high  
10 SES (the highest 33.33%), low SES (the lowest 33.33%) and the middle SES (the rest).  
11  
12

### 13 **Statistical analysis**

14  
15  
16  
17  
18  
19 Univariate analysis was conducted to find the differences of demographic  
20 characteristics, SES, history of chronic diseases, frequency of dietary intake and  
21 nutritional supplementation, passive smoking and utilization of public health services  
22 between vitamin D sufficiency and insufficiency group, and between sufficiency and  
23 deficiency group.  
24  
25  
26  
27

28  
29 To better identify the relationship between SES and vitamin D status, we examined  
30 associations between vitamin D status and separate dimensions of SES, as well as  
31 associations between vitamin D status and SES index. We conducted four multivariate  
32 logistic regression models in this study to explore: (1) the association between vitamin  
33 D insufficiency and separate dimensions of SES, i.e., women's and their husbands'  
34 education and occupation and household annual income and enough annual income for  
35 expenditure; (2) the association between vitamin D insufficiency and SES index; (3)  
36 the association between vitamin D deficiency and separate dimensions of SES; and (4)  
37 the association between vitamin D deficiency and SES index. In all four models,  
38 vitamin D sufficiency were taken as a reference group and all other variables which  
39 were statistically significant in univariate analyses were controlled.  
40  
41  
42  
43  
44  
45  
46  
47  
48  
49

### 50 **Patients and public involvement**

51  
52 No patients were involved in the development of the research question, study  
53 design or interpretation of the data. There are no plans to disseminate the results of the  
54 research to study participants or the relevant patient community.  
55  
56  
57

### 58 **Results**

### **Participant characteristics and univariate analysis results**

The median serum 25(OH)D level of the 1151 women at childbearing age was 20.90 (13.60-34.60) ng/ml. The prevalence of vitamin D insufficiency and deficiency was 20.16% and 47.80%, respectively. (Table 1).

Table 2 shows the results of univariate analysis. There were significant differences between vitamin D sufficiency and insufficiency group in women's age, women's and their husbands' education level, household annual income, enough household income for expenditure, SES index, gravidity, nutritional supplement, eggs intake, fresh meat intake, milk intake, picky eating habits and accepting physical examination during the past year. While the sufficiency and insufficiency group were similar with regard to women's and their husbands' occupation. Between vitamin D sufficiency and vitamin D deficiency group, there were significant differences in women's age, women's and their husbands' education level and their husbands' occupation, household annual income, enough household income for expenditure, SES index, gravidity, passive smoking, nutritional supplement, eggs intake, milk intake, vegetable and fruit intake, picky eating habits, doing physical exercise regularly, accepting eugenic publicity and accepting physical examination during the past year. The sufficiency and deficiency group were similar with regard to women's occupation.

### **Multivariate Logistic regression analysis**

The aforementioned statistically significant variables were included in multivariate logistic regression models to examine the association between SES and vitamin D insufficiency and deficiency (Table 3). After adjusting for women's age, gravidity, nutritional supplement, eggs intake, fresh meat intake, milk intake and picky eating habits, compared with household annual income  $\geq 10000$  Yuan, household annual income  $< 10000$  Yuan was associated with an increased risk of vitamin D insufficiency (OR:2.11, 95%CI:1.43-3.12); inadequate household income for expenditure was associated with an elevated risk of vitamin D insufficiency (aOR:1.64, 95%CI:1.10-2.46). And after adjusting for women's age, gravidity, nutritional supplement, eggs intake, milk intake, vegetables and fruits intake, picky eating habits, passive smoking and physical exercise, household annual income  $< 10000$  Yuan and inadequate

1  
2  
3  
4 household income for expenditure were also associated with an elevated risk of vitamin  
5 D deficiency (aOR: 1.66, 95%CI:1.18-2.34; aOR: 1.92, 95%CI:1.37-2.68) ,  
6  
7 respectively. While accepting eugenic publicity was associated with a decreased risk of  
8  
9 vitamin D deficiency (aOR:0.43, 95% CI:0.31-0.60). Women's education, husband's  
10  
11 education and husband's occupation were neither associated with Vitamin D  
12  
13 insufficiency nor with Vitamin D deficiency.  
14

15  
16 In table 4, multivariate logistic regression models were performed to further  
17  
18 explore the associations between SES index and vitamin D insufficiency or deficiency.  
19  
20 After adjusting for women's age, gravidity, nutritional supplement, eggs intake, fresh  
21  
22 meat intake, milk intake and picky eating habits and accepting physical examination  
23  
24 during the past year, low SES index was independently associated with an elevated risk  
25  
26 of vitamin D insufficiency (aOR: 2.46, 95%CI: 1.57-3.88). While after adjusting for  
27  
28 women's age, gravidity, passive smoking, nutritional supplement, eggs intake, milk  
29  
30 intake, vegetable and fruit intake, picky eating habits, passive smoking and physical  
31  
32 exercise, accepting eugenic publicity and accepting physical examination during the  
33  
34 past year, both middle and low SES index were associated with increased risks of  
35  
36 vitamin D deficiency (aOR: 1.43, 95%CI: 1.35-2.91; aOR: 1.98, 95%CI: 1.35-2.91).  
37  
38 Accepting physical examination during the past year was associated with a reduced risk  
39  
40 of vitamin D deficiency (aOR: 0.42, 95%CI: 0.31-0.58), suggesting it a protective factor  
41  
42 for vitamin D deficiency.  
43

## 44 Discussion

45  
46 Our study found that the prevalence of vitamin D insufficiency and deficiency  
47  
48 among non-pregnant women at childbearing age in 4 counties of Henan Province, China,  
49  
50 was 20.16% and 47.80%, respectively. Compared with countries with similar latitude  
51  
52 like US and some other Asian countries in lower latitude like Cambodia, the  
53  
54 insufficiency prevalence in our study was lower (US, 36%<sup>13</sup>; Cambodia, 35.6%<sup>14</sup>), yet  
55  
56 the deficiency prevalence was higher (US, 42%<sup>13</sup>; Cambodia, 29%<sup>14</sup>). Albeit the  
57  
58 sufficiency prevalence in our setting was much higher than the average vitamin D  
59  
60 sufficiency in northern rural China (20.3%)<sup>15</sup>, the medium serum 25(OH)D level was  
similar (20.9ng/ml vs 22.0ng/ml<sup>15</sup>), suggesting a higher rate of severely low serum

1  
2  
3  
4 25(OH)D level in our study. In fact, the prevalence of severe vitamin D deficiency  
5 (<10ng/ml) in our study was 15.99% with a medium of 5.63ng/ml. The condition of  
6 vitamin D deficiency among women at childbearing age in our setting is an alarming  
7 phenomena and worth attention.  
8  
9  
10

11 After taking into consideration of lifestyles and health service utilization, we  
12 examined how separate dimension of SES, namely, education, occupation and income  
13 and expenditure related to vitamin D status and found that only low income and  
14 inadequate income for expenditure were significantly associated with vitamin D  
15 insufficiency and deficiency. Although these dimensions of SES are interrelated, it has  
16 been proposed that each provides somewhat different resources and thus displays  
17 different relations with health outcomes. Income reflects better nutrition, housing,  
18 schooling, and recreation; occupation manifests prestige, responsibility, physical  
19 activity, and work exposures; and education indicates better access to information and  
20 resources to promote health<sup>16</sup>. In the case of vitamin D status, it was found out that adult  
21 women with lower education level in Europe were less prone to take vitamin D  
22 supplement<sup>17-19</sup> and education was the primary contributor to inequalities in the prenatal  
23 health service utilization in rural western China<sup>20</sup>, partly confirmed by our result that  
24 after adjusting for nutrition supplement and health service utilization, education was no  
25 longer a significant risk factor. Yet until now, there were limited studies concerning  
26 other possible ways through which other dimensions (like income and occupation) of  
27 SES could affect vitamin D status. Different from cardiovascular diseases to which  
28 education was the most significant indicator<sup>16</sup>, our findings implied that income and  
29 expenditure were the most significant SES indicators of vitamin D status, meaning that  
30 there might exist a distinctive pathways between low SES and vitamin D  
31 deficiency/insufficiency.  
32  
33  
34  
35  
36  
37  
38  
39  
40  
41  
42  
43  
44  
45  
46  
47  
48  
49  
50  
51

52 In multivariate models of the SES index, we found that low SES index was  
53 independently associated with an elevated risk of vitamin D insufficiency, while middle  
54 and low SES index were both associated with increased risks of vitamin D deficiency.  
55 Several pathways could explain this result. Different tendencies to sunlight exposure  
56 could be one<sup>21</sup>, knowledge and access to healthy diet and behavioral habits could be  
57  
58  
59  
60

1  
2  
3  
4 another<sup>22</sup>. It's worth noting that physical examination during the past year was  
5 associated with a reduced risk of vitamin D deficiency, a pathway of SES to vitamin D  
6 status that was hardly noticed before. Although previous studies also indicated an  
7 association between SES and vitamin D status<sup>14 23-26</sup>, our result further pointed out that  
8 for women at childbearing age in rural northern China, a considerable association still  
9 existed even after controlling for potential mediators, namely in our study, diet and  
10 nutritional supplement, health service utilization, physical exercise and passive smoking.  
11 Considering SES couldn't be a direct factor for vitamin D deficiency/insufficiency,  
12 there could be other mediators of SES in influencing vitamin D status needed to be  
13 detected; and given the complexity in analyzing whether SES was an independent risk  
14 factor for health issues<sup>27</sup>, the potential mediators analyzed in our study also need more  
15 exploration. In a word, the mechanisms underlying the association between SES and  
16 vitamin D status needs further study.

17  
18  
19  
20  
21  
22  
23  
24  
25  
26  
27  
28  
29 The associations between SES and health issues are pervasive across ages and  
30 regions, and reflect effects of inequalities of diet qualities, lifestyles and access to health  
31 care resources<sup>28</sup>. Our findings suggested that there also existed health inequalities in  
32 vitamin D status among women at childbearing age. Maternal vitamin D  
33 deficiency/insufficiency not only has adverse health effects on mothers themselves, but  
34 also means their fetuses will develop in a low vitamin D state<sup>29</sup>. It's still inconclusive  
35 whether this influence on fetuses acts at later pregnancy or throughout the whole  
36 gestational process, but it's very likely that maternal vitamin D begins its vital role in  
37 fetal development in early pregnancy because 1,25(OH)<sub>2</sub>D induces decidualization  
38 which is key to implantation<sup>29</sup> and the early pregnancy is a stage when the growth  
39 trajectory is set and bone development starts<sup>30</sup>. Some studies did find the association  
40 between maternal vitamin D status in early pregnancy and fetal and neonatal growth<sup>30</sup>.  
41 Nevertheless, the vitamin D deficiency/insufficiency in women at childbearing age is  
42 quite universal and vitamin D level is found to be lower in early pregnancy than in later  
43 pregnancy, and in non-pregnant women than in pregnant ones<sup>13</sup>. Initiating vitamin D  
44 supplementation before pregnancy could help guarantee a sufficient serum 25(OH)D  
45 level at early pregnancy. Our findings call for public and the government to pay more  
46  
47  
48  
49  
50  
51  
52  
53  
54  
55  
56  
57  
58  
59  
60

1  
2  
3  
4 attention to narrowing down social inequalities and to providing support for women  
5 with low SES, who were often found to be less educated, poorer, more obese, more  
6 likely to currently smoke, more physically inactive and less likely to frequently drink  
7 milk<sup>13</sup>. In addition, though middle SES was only associated with vitamin D deficiency,  
8 middle SES subgroups should not be considered exempt from concerns about serum  
9 25(OH)D concentrations on account of the vitamin D insufficiency-to-deficiency  
10 transition.  
11  
12  
13  
14  
15  
16

17 There are some strengths of our study. The data based was a representative one of  
18 large sample size, high measurement accuracy and good quality control. The  
19 information on the main exposures and blood sample was obtained at the same time to  
20 minimize recall bias. In addition, separate dimensions of SES and the SES index were  
21 both taken to comprehensively explore the associations between SES and vitamin D  
22 status and the potential underlying mechanisms. The SES index was constructed using  
23 principle components analysis to aggregate over education and occupation of women's  
24 and their husbands, household income and expenditure, avoiding the potential bias that  
25 might be brought about by single indicator, and thus improving the test power and the  
26 reliability. What's more, compared with previous studies which were mainly  
27 descriptive ones, our study adopted multivariate logistic regression analyses to adjust  
28 for many potential confounding and mediating factors including diet and nutrition,  
29 physical exercise, passive smoking and public health service utilization, helping better  
30 identify how SES was associated with vitamin D status.  
31  
32  
33  
34  
35  
36  
37  
38  
39  
40  
41  
42  
43

44 However, limitations also existed. The level of serum 25(OH)D might be  
45 underestimated because the blood sample of this study was collected in winter when  
46 daylight and temperature was lower than that in summer. Fortunately, it might not affect  
47 the estimation of associations between SES and vitamin D status since the collections  
48 of blood samples and interviews about exposure factors were conducted at the same  
49 time and thus the season could not be a confounding factor. Due to limited data, family  
50 assets and living conditions, which were also usual indicators of SES, were not included  
51 in our analysis. But considering family income and expenditure are thought to be a more  
52 reliable measure of SES<sup>12</sup> and can largely reflect family wealth, and because income,  
53  
54  
55  
56  
57  
58  
59  
60

1  
2  
3  
4 education, and occupation and employment are most widely used indicators of SES in  
5 epidemiological studies<sup>27</sup> than assets and living conditions, this limitation wouldn't  
6 change our conclusion. Also, our measurement of diet was based on eating frequencies  
7 of different kinds of food which might reduce the measurement accuracies and probably  
8 lead to misclassification errors. Future studies can avoid this by adopting tables of  
9 dietary nutrition.  
10  
11  
12  
13  
14

15 In conclusion, vitamin D insufficiency or deficiency was quite common among  
16 women at childbearing age in rural northern China. SES was remarkably associated  
17 with vitamin D insufficiency and deficiency. The underlying mechanisms could be  
18 nutritional and behavioral factors and utilization of public services, but there might be  
19 other pathways needed to be detected. It's suggested that more efforts should be paid  
20 on improving nutritional status, health education of women at childbearing age and  
21 equalities of health care services to change their current state of vitamin D insufficiency  
22 and deficiency.  
23  
24  
25  
26  
27  
28  
29

30 **Author statement:** Ms. Shiqi Lin, Dr. Yuan Zhang, and Mr. Jiajia Li conducted the  
31 analysis and writing of the article and reviewed and revised it. Dr Lijun Pei and Dr  
32 Xinming Song conceptualized and designed the study and the project where the data  
33 came from, coordinated and supervised data collection, and critically reviewed and  
34 revised the manuscript for important intellectual content. Dr. Gong Chen, Dr. Lifang  
35 Jiang, and Dr. Jian Chai designed the data collection instruments, acquired data, and  
36 revised the paper critically for important intellectual content. All authors approved the  
37 final manuscript as submitted and agree to be accountable for all aspects of the work in  
38 ensuring that questions related to the accuracy or integrity of any part of the work were  
39 appropriately investigated and resolved.  
40  
41  
42  
43  
44  
45  
46  
47  
48  
49

50 **Funding:** This study was supported by National Natural Science Foundation of China  
51 (Grant Number: 41871360); and Danone Institute China Diet Nutrition Research &  
52 Communication Grant (Grant Number: DIC2015-05). Neither National Natural Science  
53 Foundation of China nor Danone Institute China Diet Nutrition Research &  
54 Communication Grant had roles in the design, analysis or writing of this article.  
55  
56  
57  
58  
59

60 **Competing interests:** None declared.

**Ethics approval:** The study was approved by the Institutional Review Board of Peking University Health Science Center (IRB00001052-08083).

**Patient consent:** Written informed consent was obtained from all subjects/patients.

**Data available statement:** Data are available upon reasonable request. The datasets used and/or analyzed during the current study are available on reasonable request from the corresponding author.

## Reference

1. Holick MF. Vitamin D deficiency. *New England Journal of Medicine* 2007;357(3):266-81.
2. Schottker B, Ball D, Gellert C, et al. Serum 25-hydroxyvitamin D levels and overall mortality. A systematic review and meta-analysis of prospective cohort studies. *Ageing Research Reviews* 2013;12(2):708-18.
3. Zhang W, Stoecklin E, Eggersdorfer M. A glimpse of vitamin D status in Mainland China. *Nutrition* 2013;29(7):953-57. doi: <https://doi.org/10.1016/j.nut.2013.01.010>
4. El-Hajj Fuleihan G, Nabulsi M, Choucair M, et al. Hypovitaminosis D in healthy schoolchildren. *Pediatrics* 2001;107(4):E53. doi: 10.1542/peds.107.4.e53 [published Online First: 2001/05/23]
5. Javaid W, Sarwar A, Tariq H. PREVALENCE OF VITAMIN D DEFICIENCY AND INSUFFICIENCY IN THE PAEDIATRIC POPULATION OF PUNJAB, PAKISTAN. *Indo Am J Pharm Sci* 2019;6(6):11884-88. doi: 10.5281/zenodo.3245530
6. Maddah M, Sharami SH, Neyestani TR. Vitamin D Insufficiency Among Postmenopausal Women in Urban and Rural Areas in Guilan, Northern Iran. *Journal of Nutrition For the Elderly* 2009;28(4):386-93. doi: 10.1080/01639360903393523
7. Islam MZ, Lamberg-Allardt C, Karkkainen M, et al. Vitamin D deficiency: a concern in premenopausal Bangladeshi women of two socio-economic groups in rural and urban region. *Eur J Clin Nutr* 2002;56(1):51-56. doi: 10.1038/sj.ejcn.1601284
8. Gannage-Yared MH, Maalouf G, Khalife S, et al. Prevalence and predictors of vitamin D inadequacy amongst Lebanese osteoporotic women. *Br J Nutr* 2009;101(4):487-91. doi: 10.1017/S0007114508023404 [published Online First: 2008/07/18]
9. Darmon N, Drewnowski A. Does social class predict diet quality. *The American Journal of Clinical Nutrition* 2008;87(5):1107-17.
10. Holick M, Binkley N, Bischoff-Ferrari H, et al. Evaluation, Treatment, and Prevention of Vitamin D Deficiency: an Endocrine Society Clinical Practice Guideline. *The Journal of clinical endocrinology and metabolism* 2011;96:1911-30. doi: 10.1210/jc.2011-0385
11. Vyas S, Kumaranayake L. Constructing socio-economic status indices: how to use principal components analysis. *Health Policy and Planning* 2006;21(6):459-68.
12. McKenzie D. Measure Inequality With Asset Indicators. *Journal of Population Economics* 2005;18:229-60. doi: 10.1007/s00148-005-0224-7
13. Liu X, Baylin A, Levy PD. Vitamin D deficiency and insufficiency among US adults: prevalence, predictors and clinical implications. *Br J Nutr* 2018;119(8):928-36. doi: 10.1017/S0007114518000491 [published Online First: 2018/04/12]



14. Ginde AA, Sullivan AF, Mansbach JM, et al. Vitamin D insufficiency in pregnant and nonpregnant women of childbearing age in the United States. *American Journal of Obstetrics and Gynecology* 2010;202(5):436.e1-36.e8. doi: 10.1016/j.ajog.2009.11.036
15. Liu X, Zhang Y, Mao D, et al. Serum vitamin D levels of Chinese rural women of childbearing age in 2010-2012. *Wei sheng yan jiu = Journal of hygiene research* 2017;46(3):367-72.
16. Winkleby MA, Jatulis DE, Frank E, et al. Socioeconomic status and health: how education, income, and occupation contribute to risk factors for cardiovascular disease. *Am J Public Health* 1992;82(6):816-20. doi: 10.2105/ajph.82.6.816 [published Online First: 1992/06/01]
17. Knapik A, Kocot K, Witek A, et al. Dietary supplementation usage by pregnant women in Silesia - population based study. *Ginekol Pol* 2018;89(9):506-12. doi: 10.5603/GP.a2018.0086
18. Novakovic R, Cavelaars A, Geelen A, et al. Review Article Socio-economic determinants of micronutrient intake and status in Europe: a systematic review. *Public Health Nutr* 2014;17(5):1031-45. doi: 10.1017/s1368980013001341
19. McCartney DMA, Younger KM, Walsh J, et al. Socio-economic differences in food group and nutrient intakes among young women in Ireland. *Br J Nutr* 2013;110(11):2084-97. doi: 10.1017/s0007114513001463
20. Li C, Zeng L, Dibley MJ, et al. Evaluation of socio-economic inequalities in the use of maternal health services in rural western China. *Public Health* 2015;129(9):1251-57. doi: 10.1016/j.puhe.2015.07.002
21. Hunt-Watts HJ, Cade JE, Hadley DM. Food and nutrient intake in low-income families: the archaeology of nutrition. *Proc Nutr Soc* 2015;74(OCE5):E358-E58. doi: 10.1017/s002966511500405x
22. Calvo MS, Whiting SJ, Barton CN. Vitamin D fortification in the United States and Canada: current status and data needs. *Am J Clin Nutr* 2004;80(6 Suppl):1710s-6s. doi: 10.1093/ajcn/80.6.1710S [published Online First: 2004/12/09]
23. Leger-Guist'hau J, Domingues-Faria C, Miolanne M, et al. Low socio-economic status is a newly identified independent risk factor for poor vitamin D status in severely obese adults. *J Hum Nutr Diet* 2017;30(2):203-15. doi: 10.1111/jhn.12405
24. Kim JS. Factors Associated with Vitamin D Status Among Korean Female Adolescents. *J Pediatr Nurs* 2019;44:E79-E83. doi: 10.1016/j.pedn.2018.11.005
25. Rabenberg M, Scheidt-Nave C, Busch MA, et al. Vitamin D status among adults in Germany - results from the German Health Interview and Examination Survey for Adults (DEGS1). *BMC Public Health* 2015;15:15. doi: 10.1186/s12889-015-2016-7
26. Wyskida M, Owczarek A, Szybalska A, et al. Socio-economic determinants of vitamin D deficiency in the older Polish population: results from the PolSenior study. *Public Health Nutr* 2018;21(11):1995-2003. doi: 10.1017/s1368980017003901
27. Kaplan GA, Keil JE. Socioeconomic factors and cardiovascular disease: a review of the literature. *Circulation* 1993;88(4 Pt 1):1973-98. doi: 10.1161/01.cir.88.4.1973 [published Online First: 1993/10/01]
28. Adler NE, Newman K. Socioeconomic Disparities In Health: Pathways And Policies. *Health Affairs* 2002;21(2):60-76. doi: 10.1377/hlthaff.21.2.60
29. Shin JS, Choi MY, Longtine MS, et al. Vitamin D effects on pregnancy and the placenta. *Placenta* 2010;31(12):1027-34. doi: 10.1016/j.placenta.2010.08.015
30. Leffelaar ER, Vrijkkotte TGM, van Eijsden M. Maternal early pregnancy vitamin D status in relation

to fetal and neonatal growth: results of the multi-ethnic Amsterdam Born Children and their Development cohort. *Br J Nutr* 2010;104(1):108-17. doi: 10.1017/s000711451000022x

Table 1 Serum 25(OH)D distribution among women at childbearing age

| Serum 25(OH)D (ng/ml) * | n    | %     | Medium (25%-75%)    |
|-------------------------|------|-------|---------------------|
| Sufficient              | 369  | 32.06 | 40.20 (35.10-47.50) |
| Insufficient            | 232  | 20.16 | 24.35 (22.03-26.88) |
| Deficient               | 550  | 47.80 | 13.30 (7.75-16.60)  |
| Total                   | 1151 | 100   | 20.90 (13.60-34.60) |

Serum 25(OH)D: Serum 25-hydroxyvitamin D.\* Sufficient ( $\geq 30$  ng/ml); Insufficient (20–30 ng/ml); Deficient (<20 ng/ml)

Table 2 Demographic, socio-economic and other exposure characteristics by vitamin D status

| Vitamin D status             | Sufficient |            | insufficient |            | deficient |  |
|------------------------------|------------|------------|--------------|------------|-----------|--|
|                              | (n=369)    |            | (n=232)      |            | (n=550)   |  |
| Exposure variables           | N(%)       | N(%)       | P            | N(%)       | P         |  |
| <b>Demographic variables</b> |            |            |              |            |           |  |
| <b>Age</b>                   |            |            |              |            |           |  |
| <28                          | 222(60.20) | 113(48.71) |              | 260(47.27) |           |  |
| 28-                          | 147(39.80) | 119(51.29) | 0.006        | 290(52.73) | <0.001    |  |
| <b>BMI</b>                   |            |            |              |            |           |  |
| <24                          | 244(66.12) | 147(63.36) |              | 352(64.00) |           |  |
| 24-                          | 92(24.93)  | 58(25.00)  |              | 129(23.45) |           |  |
| 28-                          | 33(8.94)   | 27(11.64)  | 0.548        | 69(12.55)  | 0.230     |  |
| <b>Gravidity</b>             |            |            |              |            |           |  |
| 0                            | 119(32.25) | 53(22.94)  |              | 129(23.50) |           |  |
| 1                            | 159(43.09) | 97(41.99)  |              | 193(35.15) |           |  |

|                                         |            |            |        |            |        |
|-----------------------------------------|------------|------------|--------|------------|--------|
| ≥2                                      | 91(24.66)  | 81(35.06)  | 0.008  | 227(41.35) | <0.001 |
| <b>History of chronic diseases</b>      |            |            |        |            |        |
| No                                      | 42(11.38)  | 26(11.21)  |        | 62(11.27)  |        |
| Yes                                     | 327(88.62) | 206(88.79) | 0.95   | 488(88.73) | 0.96   |
| <b>Socio-economic status</b>            |            |            |        |            |        |
| <b>Women's education</b>                |            |            |        |            |        |
| High school or above                    | 126(34.24) | 51(21.98)  |        | 133(24.23) |        |
| Junior high or below                    | 242(65.76) | 181(78.02) | 0.001  | 416(75.77) | 0.001  |
| <b>Husband's education</b>              |            |            |        |            |        |
| High school or above                    | 128(34.69) | 58(25.00)  |        | 154(28.00) |        |
| Junior high or below                    | 241(65.31) | 174(75.00) | 0.012  | 396(72.00) | 0.031  |
| <b>Women's occupation</b>               |            |            |        |            |        |
| Others                                  | 79(21.41)  | 45(19.40)  |        | 119(21.64) |        |
| Unemployed or famers                    | 290(78.59) | 187(80.60) | 0.553  | 431(78.36) | 0.935  |
| <b>Husband's occupation</b>             |            |            |        |            |        |
| Others                                  | 210(57.22) | 143(62.17) |        | 368(67.15) |        |
| Unemployed or famers                    | 157(42.78) | 87(37.83)  | 0.231  | 180(32.85) | 0.002  |
| <b>Household annual income</b>          |            |            |        |            |        |
| ≥10000 (YUAN)                           | 278(75.34) | 122(52.59) |        | 309(56.39) |        |
| < 10000 (YUAN)                          | 91(24.66)  | 110(47.41) | <0.001 | 239(43.61) | <0.001 |
| <b>Household income for expenditure</b> |            |            |        |            |        |
| Surplus                                 | 189(51.22) | 65(28.02)  |        | 165(30.05) |        |
| Inadequate or deficit                   | 180(48.78) | 167(71.98) | <0.001 | 384(69.95) | <0.001 |
| <b>SES index</b>                        |            |            |        |            |        |
| High                                    | 161(43.99) | 57(24.78)  |        | 154(28.21) |        |
| Middle                                  | 124(33.88) | 71(30.87)  |        | 188(34.43) |        |
| Low                                     | 81(22.13)  | 102(44.35) | <0.001 | 204(22.13) | <0.001 |
| <b>Nutritional factors</b>              |            |            |        |            |        |
| <b>Nutritional supplement</b>           |            |            |        |            |        |
| No                                      | 231(62.60) | 179(77.16) |        | 437(79.45) |        |
| Yes                                     | 138(37.40) | 53(22.84)  | <0.001 | 113(20.55) | <0.001 |
| <b>Meat intake</b>                      |            |            |        |            |        |
| ≥4 time per week                        | 56(15.18)  | 12(5.17)   |        | 68(12.39)  |        |
| 1-3 times per month                     | 164(44.44) | 118(50.86) |        | 229(41.71) |        |
| < once per month                        | 149(40.38) | 102(43.97) | 0.001  | 252(45.90) | 0.202  |
| <b>Fish intake</b>                      |            |            |        |            |        |
| ≥1 time per week                        | 29(7.86)   | 13(5.60)   |        | 37(6.74)   |        |
| 1-3 times per month                     | 62(16.80)  | 26(11.21)  |        | 68(12.39)  |        |
| < once per month                        | 278(75.34) | 193(83.19) | 0.074  | 444(80.87) | 0.117  |
| <b>Eggs intake</b>                      |            |            |        |            |        |
| Everyday                                | 143(38.75) | 60(25.86)  |        | 151(27.50) |        |
| 4-6 times per week                      | 101(27.37) | 71(30.60)  |        | 109(19.85) |        |
| ≤ 3 times per week                      | 125(33.88) | 101(43.53) | 0.004  | 289(52.64) | <0.001 |
| <b>Milk or dairy products intake</b>    |            |            |        |            |        |

|                                                         |            |            |        |            |        |
|---------------------------------------------------------|------------|------------|--------|------------|--------|
| ≥ 4 times per week                                      | 89(24.12)  | 26(11.21)  |        | 92(16.76)  |        |
| <4 times per week but at least once per month           | 96(26.02)  | 73(31.47)  |        | 177(32.24) |        |
| Almost never                                            | 184(49.86) | 133(57.33) | <0.001 | 280(51.00) | 0.011  |
| <b>Beans and soy products intake</b>                    |            |            |        |            |        |
| Everyday                                                | 103(27.91) | 57(24.57)  |        | 130(23.68) |        |
| 4-6 times per week                                      | 76(20.60)  | 66(28.45)  |        | 88(16.03)  |        |
| 1-3 times per week                                      | 92(24.93)  | 61(26.29)  |        | 149(27.14) |        |
| < once per week                                         | 98(26.56)  | 48(20.69)  | 0.092  | 182(33.15) | 0.053  |
| <b>Vegetables and fruits intake</b>                     |            |            |        |            |        |
| Everyday                                                | 256(69.38) | 159(68.53) |        | 424(77.23) |        |
| 4-6 times per week                                      | 81(21.95)  | 56(24.14)  |        | 68(12.39)  |        |
| ≤ 3 times per week                                      | 32(8.67)   | 17(7.33)   | 0.730  | 57(10.38)  | 0.001  |
| <b>Picky eating habits</b>                              |            |            |        |            |        |
| No                                                      | 323(87.53) | 221(95.26) |        | 510(92.90) |        |
| Yes                                                     | 46(12.47)  | 11(4.74)   | 0.002  | 39(7.10)   | 0.006  |
| <b>Passive smoking</b>                                  |            |            |        |            |        |
| No                                                      | 171(46.34) | 90(38.79)  |        | 186(33.82) |        |
| Yes                                                     | 198(53.66) | 142(61.21) | 0.069  | 364(66.18) | <0.001 |
| <b>Physical exercise</b>                                |            |            |        |            |        |
| No                                                      | 298(80.76) | 200(86.21) |        | 490(89.42) |        |
| Yes                                                     | 71(19.24)  | 32(13.79)  | 0.084  | 58(10.58)  | <0.001 |
| <b>Accept eugenic publicity</b>                         |            |            |        |            |        |
| No                                                      | 156(42.74) | 115(45.70) |        | 325(59.41) |        |
| Yes                                                     | 209(57.26) | 113(49.56) | 0.067  | 222(40.59) | <0.001 |
| <b>Accept physical examination during the past year</b> |            |            |        |            |        |
| No                                                      | 176(47.83) | 135(58.44) |        | 295(72.61) |        |
| Yes                                                     | 192(52.17) | 96(41.56)  | 0.011  | 149(27.39) | <0.001 |

SES index, Socio-economic Status index

Table 3 Multivariate logistic analysis of socio-economic status and health service utilization

variables between vitamin D sufficiency and insufficiency or deficiency group

| <b>Vitamin D status</b>                          | <b>Insufficient<br/>(n=232)</b> | <b>Deficient<br/>(n=550)</b> |
|--------------------------------------------------|---------------------------------|------------------------------|
| <b>Exposure Variables</b>                        | <b>aOR(95%CI) *</b>             | <b>aOR(95%CI) †</b>          |
| <b>Socio-economic status</b>                     |                                 |                              |
| <b>Women's education</b>                         |                                 |                              |
| High school or above                             | 1.00                            | 1.00                         |
| Junior high or below                             | 1.19(0.77-1.85)                 | 1.07(0.75-1.53)              |
| <b>Husband's education</b>                       |                                 |                              |
| High school or above                             | 1.00                            | 1.00                         |
| Junior high or below                             | 1.01(0.66-1.55)                 | 1.05(0.74-1.49)              |
| <b>Husband's occupation</b>                      |                                 |                              |
| Others                                           | -                               | 1.00                         |
| Unemployed or agriculture                        | -                               | 1.18(0.86-1.62)              |
| <b>Household annual income (YUAN)</b>            |                                 |                              |
| 10000-<br>< 10000                                | 1.00<br>2.11(1.43-3.12)         | 1.00<br>1.66(1.18-2.34)      |
| <b>Household income for expenditure</b>          |                                 |                              |
| Surplus                                          | 1.00                            | 1.00                         |
| Inadequate or deficit                            | 1.64(1.10-2.46)                 | 1.92(1.37-2.68)              |
| <b>Accept eugenic publicity</b>                  |                                 |                              |
| No                                               | -                               | 1.00                         |
| Yes                                              | -                               | 0.84(0.61-1.17)              |
| <b>Physical examination during the past year</b> |                                 |                              |
| No                                               | 1.00                            | 1.00                         |
| Yes                                              | 0.77(0.53-1.11)                 | 0.43(0.31-0.60)              |

aOR, adjusted odds ratio; \* In logistic model for Vitamin D insufficiency, odds ratios were adjusted for women's age, gravidity, nutritional supplement, eggs intake, fresh meat intake, milk intake and picky eating habits. † In logistic model for Vitamin D deficiency, odds ratios were adjusted for women's age, gravidity, passive smoking, nutritional supplement, eggs intake, milk intake, vegetable and fruit intake, picky eating habits, passive smoking and physical exercise.

Table 4 Multivariate logistic analysis of SES index and health service utilization variables between

1  
2  
3  
4  
5  
6  
7  
8  
9  
10  
11  
12  
13  
14  
15  
16  
17  
18  
19  
20  
21  
22  
23  
24  
25  
26  
27  
28  
29  
30  
31  
32  
33  
34  
35  
36  
37  
38  
39  
40  
41  
42  
43  
44  
45  
46  
47  
48  
49  
50  
51  
52  
53  
54  
55  
56  
57  
58  
59  
60

vitamin D sufficiency and insufficiency or deficiency group

| <b>Vitamin D status</b>                          | <b>Insufficient<br/>(n=232)</b> | <b>Deficient<br/>(n=550)</b> |
|--------------------------------------------------|---------------------------------|------------------------------|
| <b>Exposure variables</b>                        | <b>aOR(95%CI)*</b>              | <b>aOR(95%CI) †</b>          |
| <b>SES index:</b>                                |                                 |                              |
| High                                             | 1.00                            | 1.00                         |
| Middle                                           | 1.30(0.83-2.03)                 | 1.43(1.01-2.04)              |
| Low                                              | 2.46(1.57-3.88)                 | 1.98(1.35-2.91)              |
| <b>Accept Eugenic Publicity</b>                  |                                 |                              |
| No                                               | -                               | 1.00                         |
| Yes                                              | -                               | 0.82(0.59-1.13)              |
| <b>Physical examination during the past year</b> |                                 |                              |
| No                                               | 1.00                            | 1.00                         |
| Yes                                              | 0.73(0.51-1.05)                 | 0.42(0.31-0.58)              |

SES index, Socio-economic Status index; aOR, adjusted odds ratio; \* In logistic model for Vitamin D insufficiency, odds ratios were adjusted for women's age, gravidity, nutritional supplement, eggs intake, fresh meat intake, milk intake and picky eating habits. † In logistic model for Vitamin D deficiency, odds ratios were adjusted for women's age, gravidity, passive smoking, nutritional supplement, eggs intake, milk intake, vegetable and fruit intake, picky eating habits, passive smoking and physical exercise.

# Reporting checklist for case-control study.

Based on the STROBE case-control guidelines.

## Instructions to authors

Complete this checklist by entering the page numbers from your manuscript where readers will find each of the items listed below.

Your article may not currently address all the items on the checklist. Please modify your text to include the missing information. If you are certain that an item does not apply, please write "n/a" and provide a short explanation.

Upload your completed checklist as an extra file when you submit to a journal.

In your methods section, say that you used the STROBE case-control reporting guidelines, and cite them as:

von Elm E, Altman DG, Egger M, Pocock SJ, Gøtzsche PC, Vandenbroucke JP. The Strengthening the Reporting of Observational Studies in Epidemiology (STROBE) Statement: guidelines for reporting observational studies.

|                           |                     | Reporting Item                                                                                  | Page Number |
|---------------------------|---------------------|-------------------------------------------------------------------------------------------------|-------------|
| <b>Title and abstract</b> |                     |                                                                                                 |             |
| Title                     | <a href="#">#1a</a> | Indicate the study's design with a commonly used term in the title or the abstract              | 1           |
| Abstract                  | <a href="#">#1b</a> | Provide in the abstract an informative and balanced summary of what was done and what was found | 2           |
| <b>Introduction</b>       |                     |                                                                                                 |             |
| Background / rationale    | <a href="#">#2</a>  | Explain the scientific background and rationale for the investigation being reported            | 4           |
| Objectives                | <a href="#">#3</a>  | State specific objectives, including any prespecified hypotheses                                | 4           |
| <b>Methods</b>            |                     |                                                                                                 |             |
| Study design              | <a href="#">#4</a>  | Present key elements of study design early in the paper                                         | 4-5         |
| Setting                   | <a href="#">#5</a>  | Describe the setting, locations, and relevant dates, including periods of                       | 4-5         |

recruitment, exposure, follow-up, and data collection

|    |                      |                      |     |
|----|----------------------|----------------------|-----|
| 1  |                      |                      |     |
| 2  |                      |                      |     |
| 3  | Eligibility criteria | <a href="#">#6a</a>  | 4-5 |
| 4  |                      |                      |     |
| 5  |                      |                      |     |
| 6  |                      |                      |     |
| 7  |                      |                      |     |
| 8  |                      |                      |     |
| 9  | Eligibility criteria | <a href="#">#6b</a>  | n/a |
| 10 |                      |                      |     |
| 11 |                      |                      |     |
| 12 |                      |                      |     |
| 13 |                      | <a href="#">#7</a>   | 5-6 |
| 14 |                      |                      |     |
| 15 |                      |                      |     |
| 16 |                      |                      |     |
| 17 | Data sources /       | <a href="#">#8</a>   | 4-5 |
| 18 | measurement          |                      |     |
| 19 |                      |                      |     |
| 20 |                      |                      |     |
| 21 |                      |                      |     |
| 22 |                      |                      |     |
| 23 |                      |                      |     |
| 24 | Bias                 | <a href="#">#9</a>   | 11  |
| 25 |                      |                      |     |
| 26 | Study size           | <a href="#">#10</a>  | 4-5 |
| 27 |                      |                      |     |
| 28 | Quantitative         | <a href="#">#11</a>  | 5-6 |
| 29 | variables            |                      |     |
| 30 |                      |                      |     |
| 31 |                      |                      |     |
| 32 | Statistical methods  | <a href="#">#12a</a> | 6   |
| 33 |                      |                      |     |
| 34 |                      |                      |     |
| 35 |                      |                      |     |
| 36 | Statistical methods  | <a href="#">#12b</a> | n/a |
| 37 |                      |                      |     |
| 38 | Statistical methods  | <a href="#">#12c</a> | n/a |
| 39 |                      |                      |     |
| 40 |                      |                      |     |
| 41 | Statistical methods  | <a href="#">#12d</a> | n/a |
| 42 |                      |                      |     |
| 43 |                      |                      |     |
| 44 | Statistical methods  | <a href="#">#12e</a> | n/a |
| 45 |                      |                      |     |

## Results

|    |              |                      |     |
|----|--------------|----------------------|-----|
| 46 |              |                      |     |
| 47 |              |                      |     |
| 48 |              |                      |     |
| 49 | Participants | <a href="#">#13a</a> | 6   |
| 50 |              |                      |     |
| 51 |              |                      |     |
| 52 |              |                      |     |
| 53 |              |                      |     |
| 54 |              |                      |     |
| 55 |              |                      |     |
| 56 | Participants | <a href="#">#13b</a> | n/a |
| 57 |              |                      |     |
| 58 | Participants | <a href="#">#13c</a> | n/a |
| 59 |              |                      |     |



|    |                    |                      |                                                                                                                                                                                                          |       |
|----|--------------------|----------------------|----------------------------------------------------------------------------------------------------------------------------------------------------------------------------------------------------------|-------|
| 1  | Descriptive data   | <a href="#">#14a</a> | Give characteristics of study participants (eg demographic, clinical, social) and information on exposures and potential confounders. Give information separately for cases and controls                 | 6-7   |
| 2  |                    |                      |                                                                                                                                                                                                          |       |
| 3  |                    |                      |                                                                                                                                                                                                          |       |
| 4  |                    |                      |                                                                                                                                                                                                          |       |
| 5  |                    |                      |                                                                                                                                                                                                          |       |
| 6  | Descriptive data   | <a href="#">#14b</a> | Indicate number of participants with missing data for each variable of interest                                                                                                                          | n/a   |
| 7  |                    |                      |                                                                                                                                                                                                          |       |
| 8  |                    |                      |                                                                                                                                                                                                          |       |
| 9  |                    |                      |                                                                                                                                                                                                          |       |
| 10 | Outcome data       | <a href="#">#15</a>  | Report numbers in each exposure category, or summary measures of exposure. Give information separately for cases and controls                                                                            | 7-8   |
| 11 |                    |                      |                                                                                                                                                                                                          |       |
| 12 |                    |                      |                                                                                                                                                                                                          |       |
| 13 |                    |                      |                                                                                                                                                                                                          |       |
| 14 | Main results       | <a href="#">#16a</a> | Give unadjusted estimates and, if applicable, confounder-adjusted estimates and their precision (eg, 95% confidence interval). Make clear which confounders were adjusted for and why they were included | 7-8   |
| 15 |                    |                      |                                                                                                                                                                                                          |       |
| 16 |                    |                      |                                                                                                                                                                                                          |       |
| 17 |                    |                      |                                                                                                                                                                                                          |       |
| 18 |                    |                      |                                                                                                                                                                                                          |       |
| 19 | Main results       | <a href="#">#16b</a> | Report category boundaries when continuous variables were categorized                                                                                                                                    | 7-8   |
| 20 |                    |                      |                                                                                                                                                                                                          |       |
| 21 |                    |                      |                                                                                                                                                                                                          |       |
| 22 |                    |                      |                                                                                                                                                                                                          |       |
| 23 | Main results       | <a href="#">#16c</a> | If relevant, consider translating estimates of relative risk into absolute risk for a meaningful time period                                                                                             | n/a   |
| 24 |                    |                      |                                                                                                                                                                                                          |       |
| 25 |                    |                      |                                                                                                                                                                                                          |       |
| 26 |                    |                      |                                                                                                                                                                                                          |       |
| 27 | Other analyses     | <a href="#">#17</a>  | Report other analyses done—e.g., analyses of subgroups and interactions, and sensitivity analyses                                                                                                        | n/a   |
| 28 |                    |                      |                                                                                                                                                                                                          |       |
| 29 |                    |                      |                                                                                                                                                                                                          |       |
| 30 |                    |                      |                                                                                                                                                                                                          |       |
| 31 | <b>Discussion</b>  |                      |                                                                                                                                                                                                          |       |
| 32 |                    |                      |                                                                                                                                                                                                          |       |
| 33 | Key results        | <a href="#">#18</a>  | Summarise key results with reference to study objectives                                                                                                                                                 | 8-10  |
| 34 |                    |                      |                                                                                                                                                                                                          |       |
| 35 | Limitations        | <a href="#">#19</a>  | Discuss limitations of the study, taking into account sources of potential bias or imprecision. Discuss both direction and magnitude of any potential bias.                                              | 11-12 |
| 36 |                    |                      |                                                                                                                                                                                                          |       |
| 37 |                    |                      |                                                                                                                                                                                                          |       |
| 38 |                    |                      |                                                                                                                                                                                                          |       |
| 39 |                    |                      |                                                                                                                                                                                                          |       |
| 40 |                    |                      |                                                                                                                                                                                                          |       |
| 41 | Interpretation     | <a href="#">#20</a>  | Give a cautious overall interpretation considering objectives, limitations, multiplicity of analyses, results from similar studies, and other relevant evidence.                                         | 8-10  |
| 42 |                    |                      |                                                                                                                                                                                                          |       |
| 43 |                    |                      |                                                                                                                                                                                                          |       |
| 44 |                    |                      |                                                                                                                                                                                                          |       |
| 45 |                    |                      |                                                                                                                                                                                                          |       |
| 46 | Generalisability   | <a href="#">#21</a>  | Discuss the generalisability (external validity) of the study results                                                                                                                                    | n/a   |
| 47 |                    |                      |                                                                                                                                                                                                          |       |
| 48 | <b>Other</b>       |                      |                                                                                                                                                                                                          |       |
| 49 | <b>Information</b> |                      |                                                                                                                                                                                                          |       |
| 50 |                    |                      |                                                                                                                                                                                                          |       |
| 51 |                    |                      |                                                                                                                                                                                                          |       |
| 52 | Funding            | <a href="#">#22</a>  | Give the source of funding and the role of the funders for the present study and, if applicable, for the original study on which the present article is based                                            | 12    |
| 53 |                    |                      |                                                                                                                                                                                                          |       |
| 54 |                    |                      |                                                                                                                                                                                                          |       |
| 55 |                    |                      |                                                                                                                                                                                                          |       |
| 56 |                    |                      |                                                                                                                                                                                                          |       |
| 57 |                    |                      |                                                                                                                                                                                                          |       |
| 58 |                    |                      |                                                                                                                                                                                                          |       |
| 59 |                    |                      |                                                                                                                                                                                                          |       |
| 60 |                    |                      |                                                                                                                                                                                                          |       |

1 The STROBE checklist is distributed under the terms of the Creative Commons Attribution License CC-BY.

2 This checklist was completed on 29. June 2020 using <https://www.goodreports.org/>, a tool made by the  
3 [EQUATOR Network](#) in collaboration with [Penelope.ai](#)  
4  
5  
6  
7  
8  
9  
10  
11  
12  
13  
14  
15  
16  
17  
18  
19  
20  
21  
22  
23  
24  
25  
26  
27  
28  
29  
30  
31  
32  
33  
34  
35  
36  
37  
38  
39  
40  
41  
42  
43  
44  
45  
46  
47  
48  
49  
50  
51  
52  
53  
54  
55  
56  
57  
58  
59  
60

For peer review only

# BMJ Open

## Socio-economic status and vitamin D deficiency among women at childbearing age: a population-based case-control study in rural northern China

|                                 |                                                                                                                                                                                                                                                                                                                                                                                                                                                                                                                              |
|---------------------------------|------------------------------------------------------------------------------------------------------------------------------------------------------------------------------------------------------------------------------------------------------------------------------------------------------------------------------------------------------------------------------------------------------------------------------------------------------------------------------------------------------------------------------|
| Journal:                        | <i>BMJ Open</i>                                                                                                                                                                                                                                                                                                                                                                                                                                                                                                              |
| Manuscript ID                   | bmjopen-2020-042227.R1                                                                                                                                                                                                                                                                                                                                                                                                                                                                                                       |
| Article Type:                   | Original research                                                                                                                                                                                                                                                                                                                                                                                                                                                                                                            |
| Date Submitted by the Author:   | 30-Dec-2020                                                                                                                                                                                                                                                                                                                                                                                                                                                                                                                  |
| Complete List of Authors:       | Lin, Shiqi; Peking University, Institute of Population Research<br>Jiang, Lifang; National Health Commission Key Laboratory of Birth Defects Prevention<br>Zhang, Yuan; Peking University, Institute of Population Research<br>Chai, Jian; National Health Commission Key Laboratory of Birth Defects Prevention<br>Li, Jiajia; Peking University, Institute of Population Research<br>Song, Xinming; Peking University, Institute of Population Research<br>Pei, Lijun; Peking University, Institute of Population Research |
| <b>Primary Subject Heading</b>: | Public health                                                                                                                                                                                                                                                                                                                                                                                                                                                                                                                |
| Secondary Subject Heading:      | Epidemiology                                                                                                                                                                                                                                                                                                                                                                                                                                                                                                                 |
| Keywords:                       | NUTRITION & DIETETICS, PUBLIC HEALTH, SOCIAL MEDICINE                                                                                                                                                                                                                                                                                                                                                                                                                                                                        |
|                                 |                                                                                                                                                                                                                                                                                                                                                                                                                                                                                                                              |

SCHOLARONE™  
Manuscripts

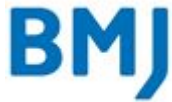

I, the Submitting Author has the right to grant and does grant on behalf of all authors of the Work (as defined in the below author licence), an exclusive licence and/or a non-exclusive licence for contributions from authors who are: i) UK Crown employees; ii) where BMJ has agreed a CC-BY licence shall apply, and/or iii) in accordance with the terms applicable for US Federal Government officers or employees acting as part of their official duties; on a worldwide, perpetual, irrevocable, royalty-free basis to BMJ Publishing Group Ltd ("BMJ") its licensees and where the relevant Journal is co-owned by BMJ to the co-owners of the Journal, to publish the Work in this journal and any other BMJ products and to exploit all rights, as set out in our [licence](#).

The Submitting Author accepts and understands that any supply made under these terms is made by BMJ to the Submitting Author unless you are acting as an employee on behalf of your employer or a postgraduate student of an affiliated institution which is paying any applicable article publishing charge ("APC") for Open Access articles. Where the Submitting Author wishes to make the Work available on an Open Access basis (and intends to pay the relevant APC), the terms of reuse of such Open Access shall be governed by a Creative Commons licence – details of these licences and which [Creative Commons](#) licence will apply to this Work are set out in our licence referred to above.

Other than as permitted in any relevant BMJ Author's Self Archiving Policies, I confirm this Work has not been accepted for publication elsewhere, is not being considered for publication elsewhere and does not duplicate material already published. I confirm all authors consent to publication of this Work and authorise the granting of this licence.

1  
2  
3 **Socio-economic status and vitamin D deficiency among women at childbearing**  
4 **age: a population-based case-control study in rural northern China**  
5  
6

7 Shiqi Lin<sup>1,#</sup>, Lifang Jiang<sup>2,#</sup>, Yuan Zhang<sup>1,#</sup>, Jian Chai<sup>2</sup>, Jiajia Li<sup>1</sup>, Xinming Song<sup>1\*</sup>,  
8 Lijun Pei<sup>1\*</sup>  
9

10  
11  
12 <sup>1</sup>Institute of Population Research/China Center on Population Health and development,  
13 Peking University, Beijing, 100871, China.

14  
15 <sup>2</sup> National Health Commission Key Laboratory of Birth Defects Prevention, Henan  
16 Key Laboratory of Population Defects Prevention, Zhengzhou, 450002, China.

17  
18 # Shiqi Lin, Lifang Jiang and Yuan Zhang contributed equally to this work and should  
19 be considered co-first authors.  
20  
21

22  
23 **\* Address correspondence to:**

24  
25 Lijun Pei, [pei\\_lj@pku.edu.cn](mailto:pei_lj@pku.edu.cn). and Xinming Song, [xmsong@pku.edu.cn](mailto:xmsong@pku.edu.cn).

26  
27 Institute of Population Research, Peking University, No.5 Yiheyuan Road, Haidian  
28 District, Beijing 100871, China. +86 010-62751974  
29

30 **Emails of all authors:**

31 Shiqi Lin: [linshiqi@pku.edu.cn](mailto:linshiqi@pku.edu.cn);

32 Lifang Jiang: [jiangzz66@163.com](mailto:jiangzz66@163.com)

33 Yuan Zhang: [zyzyzhangyuan@pku.edu.cn](mailto:zyzyzhangyuan@pku.edu.cn);

34 Jian Chai: [stopdo@163.com](mailto:stopdo@163.com)

35 Jiajia Li: [lijiajia95@pku.edu.cn](mailto:lijiajia95@pku.edu.cn);

36 Xinming Song, [xmsong@pku.edu.cn](mailto:xmsong@pku.edu.cn)

37 Lijun Pei: [pei\\_lj@pku.edu.cn](mailto:pei_lj@pku.edu.cn).  
38  
39  
40  
41

42 **Word count:** 3668  
43  
44  
45

46 **Short title:** Socio-economic status and vitamin D deficiency  
47  
48  
49  
50  
51  
52  
53  
54  
55  
56  
57  
58  
59  
60

### Abstract

**Objective:** To explore the association between socio-economic status (SES) and vitamin D deficiency/insufficiency of women at childbearing age in rural northern China.

**Design:** A population-based case-control study was conducted.

**Setting:** Four counties of Henan Province, China from 2009 to 2010.

**Participants:** 1151 non-pregnant healthy women between 18-40 years old.

**Primary and secondary outcome measures:** Serum 25-hydroxyvitamin D (25(OH)D) levels were measured using High-performance Liquid Chromatography -Tandem Mass Spectrometry. Vitamin D insufficiency was defined as serum 25(OH)D  $\geq 20$  and  $< 30$  ng/ml, deficiency as  $\geq 10$  and  $< 20$  ng/ml and severe deficiency as  $< 10$  ng/ml. SES was measured separately by women's and their husbands' education levels and occupations, household income and expenditure, as well as aggregately by SES index constructed with principal components analysis.

**Results:** The median serum 25(OH)D level was 20.90 (13.60-34.60) ng/ml and the prevalence of vitamin D insufficiency, deficiency and severe deficiency was 20.16%, 31.80% and 15.99%, respectively. After being adjusted, household annual income  $< 10000$  RMB was associated with increased risks of vitamin D insufficiency (aOR: 2.10, 95%CI: 1.41~3.14), deficiency (aOR: 1.58, 95%CI: 1.09~2.29) and severe deficiency (aOR: 2.79, 95%CI: 1.78~4.38); inadequate household income for expenditure was associated with elevated risks of vitamin D insufficiency (aOR: 1.66, 95%CI: 1.08~2.54) and deficiency (aOR: 1.81, 95%CI: 1.26~2.62); low SES index was associated with elevated risks of vitamin D insufficiency (aOR: 2.40, 95%CI: 1.52~3.80) and deficiency (aOR: 1.64, 95%CI: 1.08~2.50); both middle and low SES index were associated with increased risks of vitamin D severe deficiency (aOR: 1.70, 95%CI: 1.02~2.84; aOR: 2.45, 95%CI: 1.45~4.14).

**Conclusions:** Lower SES was associated with higher risks of vitamin D deficiency/insufficiency of women at childbearing age in rural northern China. More should be done to explore potential mechanisms and to narrow down SES inequalities in vitamin D status.

**Key words:** socio-economic status, vitamin D insufficiency and deficiency, women at childbearing age, rural northern China

## Article summary

### Strengths and limitations of the study:

The data was a population-based and representative one of larger sample size with the information on main exposures and blood samples obtained at the same time to minimize recall bias.

Both separate dimensions and aggregate index of SES were taken to thoroughly examine the association between SES and vitamin D status.

It's one of the few studies to target women at childbearing age in rural northern China for whom sufficient vitamin D were important both for themselves and for their offspring, but also among whom vitamin D insufficiency/deficiency were found to be prevail.

The level of serum 25(OH)D might be underestimated because the blood sample of this study was collected in winter when daylight and temperature was lower than that in summer.

The laboratory didn't participate in any vitamin D standardization program or use standardization of 25(OH)D measurements, which might affect comparison between the present study and other studies.

### Introduction

Vitamin D deficiency/ insufficiency has been concerned to be of high prevalence in both developing and developed countries and is linked to occurrences of a variety of chronic diseases and premature mortality<sup>1</sup>. In China, it's also reported that vitamin D deficiency/ insufficiency is common in almost all age groups and areas<sup>2</sup> and is pertinent to clinical issues besides skeletal problems, such as metabolic syndrome<sup>3</sup> and its complications<sup>4</sup>, dyslipidemia<sup>5</sup> and cardiovascular diseases<sup>6</sup> and even emotional, behavioral and attentional problems<sup>7</sup>, depression<sup>8</sup>, as well as reduced sperm quality<sup>9</sup> and lower total testosterone<sup>10</sup>. In particular, maternal vitamin D deficiency/insufficiency has been found to be associated not only with adverse gestational and neonatal outcomes like low birth weight, prematurity<sup>11</sup>, and gestational

1  
2  
3  
4 diabetes mellitus<sup>12</sup>, but also with offspring vitamin D deficiency<sup>11</sup>, impaired intra-  
5  
6 uterine growth<sup>13, 14</sup>, type I diabetes, nutritional rickets and pneumonia in adulthood<sup>15</sup>.  
7  
8 Albeit still inconclusive, maternal vitamin D might begin its vital role in fetal  
9  
10 development in early pregnancy<sup>13</sup>, thus suggesting the importance of having adequate  
11  
12 vitamin D concentration when preparing for pregnancy. In a word, given that sufficient  
13  
14 vitamin status is so vital for women themselves and their offspring and that serum  
15  
16 25(OH)D concentrations were low among them<sup>3</sup> and their newborn babies in Chinese  
17  
18 populations<sup>2, 16, 17</sup>, it's of significance to target the vitamin D status and its influencing  
19  
20 factors of women at childbearing age.

21  
22 Since inadequate sunlight exposure and absorption of vitamin D are among the  
23  
24 major causes of vitamin D deficiency/insufficiency<sup>18</sup>, a series of studies have indicated  
25  
26 vitamin D deficiency/insufficiency follows a gradient of socio-economic status (SES)<sup>19-</sup>  
27  
28 <sup>23</sup>, a crucial factor determining one's lifestyles. Even though SES may not be itself a  
29  
30 direct causal factor for health problems, exploring social inequalities of vitamin D  
31  
32 deficiency/insufficiency can help to provide clues to the actual mechanisms involved<sup>24</sup>.  
33  
34 However, prior studies concerning this topic were most descriptive ones, based mainly  
35  
36 on findings from western and West Asian countries where distribution of lifestyles in  
37  
38 different SES was very distinct from that in other countries like China. Moreover,  
39  
40 previous researches on the association between SES and vitamin D  
41  
42 deficiency/insufficiency often focused on elderly and children, seldom on women at  
43  
44 childbearing age. Therefore, the aim of our study was to explore the association  
45  
46 between SES and vitamin D deficiency/insufficiency among women at childbearing  
47  
48 age in rural northern China where prevalence of vitamin D deficiency/insufficiency  
49  
50 may be higher than that in regions of lower latitude and more developed economy<sup>2</sup>.

## 51 **Materials and methods**

### 52 **Study design and population**

53  
54 This was a population-based case-control study. The data of the present research  
55  
56 was based on the Study on Population-based Birth Defects Monitoring and  
57  
58 Comprehensive Intervention Project which aimed to establish a prospective cohort of  
59  
60 married but unpregnant women at child-bearing age in 2009-2010 in Henan Province,



1  
2  
3 collect their baseline characteristics including basic demographic and socio-economic  
4 characteristics, dietary intake and behavioral factors as well as their blood samples,  
5 follow them until their pregnancy results were observed so as to explore the association  
6 between pre-pregnancy risk factors and pregnancy results. A multi-stage cluster  
7 sampling method was used to obtain a representative sample of targeted population. 1)  
8 In the first stage, 4 counties (Hui County, Mengzhou County, Xinmi County and  
9 Luanchuan County; the latitudes of which are 35°17' N, 34°50' N, 34°32' N and 35°51'  
10 N, respectively) were randomly selected from 158 counties in Henan Province; 2) In  
11 the second stage, 40 towns (the next administrative unit below County) were randomly  
12 selected from the 4 counties. 3 ) In the third stage, 5 villages were randomly selected  
13 from each town. 4) In the fourth stage, 10 women at child-bearing age and their  
14 husbands were randomly selected in each village. The selection criteria was 1) married  
15 women with local permanent residency, 2) between 18-40 years old, 3) not pregnancy  
16 at present, 4) living in the research counties with local registered permanent residency  
17 and 5) without any severe heart, liver, kidney, metabolic diseases, blood or other system  
18 diseases or cancers. Finally, 1151 of 2000 women had pregnancy results and were thus  
19 included in the project. In our study, cases were defined as women with serum 25(OH)D  
20 <30 ng/mL and were further subdivided into three groups: 1) vitamin D insufficiency:  
21 serum 25(OH)D  $\geq 20$ –and < 30 ng/ml; 2) deficiency: serum 25(OH)D  $\geq 10$  and < 20  
22 ng/ml; 3) severe deficiency: serum 25(OH)D < 10ng/ml. Controls were those with  
23 serum 25(OH)D  $\geq 30$  ng/ml. Altogether, there were 369 controls and 782 cases, among  
24 whom 232 were of vitamin D insufficiency, 366 of deficiency and 184 of severe  
25 deficiency.

### 26 27 28 29 30 31 32 33 34 35 36 37 38 39 40 41 42 43 44 45 **Collection of data and blood sample**

46 Trained healthcare workers conducted face-to-face interviews with participants  
47 and their families at baseline to collect information on the women's and their husbands'  
48 demographic and social economic characteristics, history of adverse pregnancy  
49 outcomes, women's history of diseases and treatment, eating habits and the frequency  
50 of dietary and nutrient intake, behavioral factors, environmental factors and the  
51 utilization of public health services.

52 For each participant, a fasting venous blood sample (8 ml) was also collected at  
53  
54  
55  
56  
57  
58  
59  
60

1  
2  
3  
4 baseline by professional healthcare workers. The collection time of blood samples was  
5 in December, 2009, and January and February, 2010. The sample was prepared by  
6 centrifugation and stored at  $-80^{\circ}\text{C}$  at Peking University until analysis.  
7  
8

9  
10 The study protocol was reviewed and approved by Institutional Review Board of  
11 Peking University Health Science Center, and written informed consent was obtained  
12 from all subjects before completing the questionnaire and collection of blood samples  
13 at the time of the baseline survey.  
14  
15

### 16 17 **Measurement of vitamin D status**

18  
19 Serum 25-hydroxyvitamin D (25(OH)D) concentration is the parameter of choice  
20 for the assessment of vitamin D status. The serum 25-hydroxyl vitamin D3  
21 concentrations of the 1,151 women's blood samples were quantitatively determined  
22 by High-performance Liquid Chromatography-Tandem Mass Spectrometry (HPLC-  
23 MS/MS, Ultimate3000 - API 3200 Q TRAP) method to overcome inaccuracy problems  
24 associated with immunoassays and protein binding assays<sup>25</sup>. Vitamin D severe  
25 deficiency was defined as serum 25(OH)D  $<10$  ng/mL, vitamin D deficiency as  $\geq 10$   
26 and  $<20$  ng/ml and insufficiency as  $\geq 20$  and  $<30$  ng/ml<sup>26</sup>.  
27  
28  
29  
30  
31  
32  
33  
34

### 35 36 **Definitions of socio-economic status**

37  
38 In our study, SES was measured by both separate and aggregate indicators. There  
39 were six separate dimensions of SES: women's education level, their husbands'  
40 education level, women's occupation, their husbands' occupation, household annual  
41 income and whether their annual income was enough for expenditure. Women's or  
42 husbands' educational level was grouped into "high school or above" and "junior high  
43 school or below"; Women's and husbands' occupation was grouped into "unemployed  
44 or farmers" and "other occupations"; Household annual income was grouped into " $\geq$   
45 1000 RMB" and " $<1000$  RMB"; and household income for expenditure was measured  
46 by the question "whether your family have enough income for expenditure in your daily  
47 life?" and we grouped the answers of "a lot more income than expenditure", "a little  
48 more income than expenditure" and "balanced" into "surplus" and "income is not  
49 enough for expenditure" and "a lot more expenditure than income" into "inadequate or  
50  
51  
52  
53  
54  
55  
56  
57  
58  
59  
60

deficit”.

Aggregating over these six dimensions of SES, we further constructed an SES index using principal components analysis. To make the categorical form of data meet the requirement of principle components analysis, all the six categorical variables were coded into binary ones. Since all data have an equal weight, the co-variance matrix was used and the Bartlett’s test of sphericity was statistically significant ( $P < 0.001$ ), indicating it suitable to use principal components analysis here. The first principal component was taken as a measure of SES index<sup>27</sup>, accounting for 29% of total variation. This percentage, though seemed not high, was in accordance with previous studies<sup>28</sup>, reflecting that correlations between variables were complex and that each variable may have its own determinant other than SES<sup>27</sup>. The SES index was then divided into three subgroups, namely, high, middle and low SES subgroup with the 33<sup>rd</sup> and 66<sup>th</sup> percentiles as the cut-off points.

### **Covariates**

A number of possible confounding factors were also assessed including demographic variables, nutritional factors, behavioral factors and the utilization of health services.

Demographic variables included age, the body mass index (BMI), gravidity and history of chronic diseases. BMI was calculated by  $\text{weight}/\text{height}^2$  and was grouped into  $< 24 \text{ kg}/\text{m}^2$  as normal weight or underweight,  $\geq 24 \text{ kg}/\text{m}^2$  to  $< 28 \text{ kg}/\text{m}^2$  as overweight and  $\geq 28 \text{ kg}/\text{m}^2$  as obesity<sup>29</sup>; we defined history of chronic diseases as having been diagnosed of any one of the following diseases: anemia, hypertension, hyperlipemia, heart disease, diabetes, hyperglycemia, thyroid diseases, phenylketonuria, epilepsy, asthma, chronic renal diseases, systematic lupus erythematosus, rheumatic arthritis, deep vein thrombosis, cancer, depression or anxiety and schizophrenia.

Nutritional factors included nutritional supplement, meat intake, fish intake, eggs intake, milk or dietary products, beans and soy product intake and vegetable intake. Nutritional supplement was evaluated by having taken any of the following during the past month: vitamin A, multivitamin B, vitamin B1, vitamin B2, vitamin B6, vitamin

1  
2  
3  
4 B12, vitamin C, vitamin E, cod-liver oil or vitamin D, iron preparations, calcium tablets  
5 and zinc supplements. Food intake was measured by average frequencies of the food  
6 intake during the past year. The frequencies included “everyday”, “4-6 times per week”,  
7 “1-3 times per week”, “1-3 times per month” and “hardly ever” and were divided into  
8 2-3 groups according to distribution of the answered frequencies of different food.  
9  
10  
11  
12

13 Behavioral factors included picky eating habits, passive smoking and physical  
14 exercises. Picky eating habits were measured by the question “do you have picky  
15 eating habits, i.e., having preferences to some special food such as fruit and vegetables  
16 and keeping eating them every day while rejecting other kinds of food such as meat?”;  
17 having passive smoking was defined as “being passively inhaled cigarette smoke by  
18 smokers around you for more than 15 minutes every day”; taking physical exercises  
19 meant taking any one of the following indoor or outdoor exercises at least once a week  
20 for more than 30 minutes per time: walking, running, ball games, Tai Chi or other  
21 health-promotion physical exercises, swimming and other sports.  
22  
23  
24  
25  
26  
27  
28  
29

30 Utilization of health services included accepting eugenic publicity and accepting  
31 physical examination during the past year. Having accepted eugenic publicity was  
32 defined as having received materials (like brochures) from health service institutions  
33 during the past year about knowledge of eugenics such as how to prepare for pregnancy;  
34 having accepted physical examination during the past year was defined as having  
35 received systematic inspections of the body for signs and symptoms of disease or  
36 abnormality during the past year.  
37  
38  
39  
40  
41  
42  
43

#### 44 **Statistical analysis**

45  
46 Univariate analysis was conducted to test the differences of vitamin D status across  
47 different demographic characteristics, SES, nutritional variables and utilization of  
48 public health services through  $\chi^2$  test.  
49  
50  
51

52 To better identify the relationship between SES and vitamin D status, we examined  
53 associations between vitamin D status and separate dimensions of SES, as well as  
54 associations between vitamin D status and SES index. Six multivariate logistic  
55 regression models were performed in this study to explore: (1) the association between  
56  
57  
58  
59  
60

1  
2  
3  
4 vitamin D insufficiency and separate dimensions of SES, i.e., women's and their  
5 husbands' education and occupation and household annual income and enough annual  
6 income for expenditure; (2) the association between vitamin D insufficiency and SES  
7 index; (3) the association between vitamin D deficiency and separate dimensions of  
8 SES; (4) the association between vitamin D deficiency and SES index; (5) the  
9 association between vitamin D severe deficiency and separate dimensions of SES; and  
10 (6) the association between vitamin D severe deficiency and SES index. In all the  
11 models, vitamin D sufficiency were taken as a reference group and the potential  
12 confounding factors were adjusted.

### 21 **Patients and public involvement**

22 No patients (participants) involved.

## 25 **Results**

### 26 **Participant characteristics**

27  
28 The median serum 25(OH)D level of the 1,151 women at childbearing age was  
29 20.90 (13.60-34.60) ng/ml. The prevalence of vitamin D insufficiency, deficiency and  
30 severe deficiency was 20.16%, 31.80% and 15.99%, respectively. (Table 1).

31  
32 Table 2 shows vitamin D status by demographic, socio-economic, nutritional  
33 supplement and utilization of health services. Overall, 51.69% of the study population  
34 were < 28 years old, 64.55% were of normal BMI, 78.89% were unemployed or farmers,  
35 73.02% had junior high school or below educational attainment, 61.71% had household  
36 annual income  $\geq$ 10000 RMB and 63.57% felt their household income were inadequate  
37 or deficit for expenditure.

### 38 **Multivariate Logistic regression analysis**

39  
40 Table 3 displays multivariate logistic analysis of association between socio-  
41 economic status and vitamin D level. After adjusting for confounding factors, compared  
42 with household annual income  $\geq$ 10000 RMB, household annual income <10000 RMB  
43 was associated with an increased risk of vitamin D insufficiency (aOR:2.10, 95%CI:  
44 1.41~3.14), deficiency (aOR: 1.58, 95%CI: 1.09~2.29) as well as severe deficiency  
45  
46  
47  
48  
49  
50  
51  
52  
53  
54  
55  
56  
57  
58  
59  
60

(aOR: 2.79, 95%CI: 1.78~4.38); inadequate household income for expenditure was associated with an elevated risk of vitamin D insufficiency (aOR:1.66, 95%CI: 1.08~2.54) and deficiency (aOR: 1.81, 95%CI: 1.26~2.62). While accepting physical examination during the past year was associated with a decreased risk of vitamin D deficiency (aOR:0.49, 95% CI: 0.34~0.70) and severe deficiency (aOR: 0.25, 95%CI: 0.15~0.41).

In table 4, multivariate logistic regression models were performed to further explore the association between vitamin D level and SES index or health service utilization. After adjusting for confounding factors, low SES index was associated with an increased risk of vitamin D insufficiency (aOR: 2.40, 95%CI: 1.52~3.80) and deficiency (aOR: 1.64, 95%CI: 1.08~2.50); both middle and low SES index were associated with increased risks of vitamin D severe deficiency (aOR:1.70, 95%CI: 1.02~2.84; aOR: 2.45, 95%CI: 1.45~4.14). Accepting physical examination during the past year was associated with a reduced risk of vitamin D deficiency (aOR: 0.49, 95%CI: 0.35~0.70) and severe deficiency (aOR: 0.24, 95%CI: 0.15~0.39), suggesting it a protective factor for vitamin D deficiency.

## Discussion

Our study found that the prevalence of vitamin D insufficiency and deficiency (serum 25(OH)D <20ng/ml) among women at childbearing age who intended to become pregnant in 4 counties of Henan Province, China, was 20.16% and 47.80%, respectively. Compared with countries with similar latitude like US and some other Asian countries in lower latitude like Cambodia, the insufficiency prevalence in our study was lower (US, 36%<sup>30</sup>; Cambodia, 35.6%<sup>31</sup>), yet the deficiency prevalence was higher (US, 42%<sup>30</sup>; Cambodia, 29%<sup>31</sup>). Albeit the sufficiency prevalence in our setting was much higher than the average vitamin D sufficiency in northern rural China (20.3%)<sup>32</sup>, the medium serum 25(OH)D level was similar (20.9ng/ml vs 22.0ng/ml<sup>32</sup>), suggesting a higher rate of severely low serum 25(OH)D level in our study. In fact, the prevalence of severe vitamin D deficiency (<10ng/ml) in our study was 15.99% with a medium of 5.63ng/ml. The condition of vitamin D deficiency among women at

1  
2  
3  
4 childbearing age in our setting is an alarming phenomena and worth attention.

5  
6 After taking into consideration of lifestyles and health service utilization, we  
7  
8 examined how separate dimension and aggregate index of SES related to vitamin D  
9  
10 status and found that lower income, inadequate income for expenditure and lower SES  
11  
12 index were significantly associated with vitamin D insufficiency and deficiency while  
13  
14 education and occupation were not. Several pathways could explain this result.  
15  
16 Different tendencies to sunlight exposure could be one<sup>33</sup>, knowledge and access to  
17  
18 vitamin D supplement and behavioral habits could be another<sup>34</sup>. It's worth noting that  
19  
20 in our study, physical examination during the past year was associated with a reduced  
21  
22 risk of vitamin D deficiency, a pathway of SES to vitamin D status that was hardly  
23  
24 noticed before. Although previous studies also indicated an association between SES  
25  
26 and vitamin D status<sup>30, 35-38</sup>, our result further pointed out that for women at childbearing  
27  
28 age in rural northern China, a considerable association still existed even after  
29  
30 controlling for potential mediators, namely in our study, diet and nutritional supplement,  
31  
32 health service utilization, physical exercise and passive smoking. Considering SES  
33  
34 couldn't be a direct factor for vitamin D deficiency/insufficiency, there could be other  
35  
36 mediators of SES in influencing vitamin D status needed to be detected. For example,  
37  
38 it was found out that adult women with lower education level in Europe were less prone  
39  
40 to take vitamin D supplement<sup>39-41</sup>. Yet until now, there were limited studies exploring  
41  
42 possible ways through which different dimensions and composite SES could affect  
43  
44 vitamin D status. The mechanisms underlying the association between SES and vitamin  
45  
46 D status needs further study.

47  
48 In this study, the principal component analysis was used to construct SES index.  
49  
50 There are different ways of measuring SES in studies of vitamin D status. The most  
51  
52 commonly seen is focusing on one dimension of SES by using individual SES  
53  
54 indicators such as education attainment, income, expense management, and  
55  
56 occupation<sup>36, 38</sup>. Indicators such as "poverty-income ratio", a ratio of family income to  
57  
58 poverty threshold used in National Health and Nutrition Examination Survey  
59  
60 (NHANES) in US<sup>42</sup>, also focuses on one dimension of SES, i.e., family income, but

1  
2  
3  
4 takes into consideration of local development to create an index<sup>30</sup>. Another way is to  
5 develop composite SES indexes with scales given to different indicators or indicator  
6 combinations. For example, Kuppuswamy's socioeconomic status, a relatively well-  
7 established tool in India, assigns 7 scores to education, 10 for occupation, and 12 for  
8 family income and makes 5 groups of SES<sup>43</sup> and SES index for German Health  
9 Interview and Examination Survey for Adults (DEGS1), assigns different score to  
10 different combination of specific kinds of occupation, income and education<sup>37</sup>. While  
11 some others develop a specific questionnaire based on local conditions to get an SES  
12 score. For instance, EPICES, a French evaluation of low socio-economic status and  
13 inequalities in Health Examination Centers, aggregates a lot more social dimensions  
14 such as leisure activities<sup>35</sup>. In our study, we not only evaluated several individual  
15 dimensions of SES to examine their separate associations to vitamin D  
16 deficiency/insufficiency, but also constructed an SES index. Since there is no well-  
17 recognized way of measuring SES in local area and it seems lack of credibility to assign  
18 scores to different SES dimensions by arbitrary, the principal components analysis we  
19 used was a 'data-driven' one and thus could avoid subjective judgement to some extent.  
20 Though hardly seen in analyzing vitamin D status, principal components analysis has  
21 proven to be quite validated and robust in constructing SES in other epidemiological  
22 studies<sup>27</sup>. By summing effects of individual SES indicators, we could get a better view  
23 of the association between SES and vitamin D insufficiency/deficiency and increase the  
24 test power.

25  
26  
27  
28  
29  
30  
31  
32  
33  
34  
35  
36  
37  
38  
39  
40  
41  
42  
43  
44  
45 Suggesting a pervasive vitamin D insufficiency/deficiency and health inequalities  
46 in vitamin D status among women at childbearing age in rural China, our findings call  
47 for attention paid to those population. Maternal vitamin D deficiency/insufficiency not  
48 only has adverse health effects on mothers themselves, but also means their fetuses will  
49 develop in a low vitamin D state<sup>13</sup>. It's still inconclusive whether this influence on  
50 fetuses acts at later pregnancy or throughout the whole gestational process, but it's very  
51 likely that maternal vitamin D begins its vital role in fetal development in early  
52 pregnancy because 1,25(OH)<sub>2</sub>D induces decidualization which is key to implantation<sup>13</sup>  
53  
54  
55  
56  
57  
58  
59  
60



1  
2  
3  
4 and the early pregnancy is a stage when the growth trajectory is set and bone  
5 development starts<sup>14</sup>. Some studies did find the association between maternal vitamin  
6 D status in early pregnancy and fetal and neonatal growth<sup>14</sup>. Nevertheless, the vitamin  
7 D deficiency/insufficiency in women at childbearing age is quite universal and vitamin  
8 D level is found to be lower in early pregnancy than in later pregnancy, and in non-  
9 pregnant women than in pregnant ones<sup>44</sup>. Initiating vitamin D supplementation before  
10 pregnancy could help guarantee a sufficient serum 25(OH)D level at early pregnancy.  
11 It's of importance to narrow down social inequalities and to provide support for women  
12 with lower SES, who were often found to be less educated, poorer, more obese, more  
13 likely to currently smoke, more physically inactive and less likely to frequently drink  
14 milk<sup>44</sup>.

15  
16  
17  
18  
19  
20  
21  
22  
23  
24  
25 There are some strengths of our study. The data based was a representative one of  
26 large sample size, high measurement accuracy and good quality control. The  
27 information on the main exposures and blood sample was obtained at the same time to  
28 minimize recall bias. In addition, separate dimensions of SES and the SES index were  
29 both taken to comprehensively explore the associations between SES and vitamin D  
30 status and the potential underlying mechanisms. The SES index was constructed using  
31 principal components analysis to aggregate over education and occupation of women's  
32 and their husbands, household income and expenditure, avoiding the potential bias that  
33 might be brought about by single indicator, and thus improving the test power and the  
34 reliability. What's more, compared with previous studies which were mainly  
35 descriptive ones, our study adopted multivariate logistic regression analyses to adjust  
36 for many potential confounding and mediating factors including diet and nutrition,  
37 physical exercise, passive smoking and public health service utilization, helping better  
38 identify how SES was associated with vitamin D status.

39  
40  
41  
42  
43  
44  
45  
46  
47  
48  
49  
50  
51  
52 However, limitations also existed. The level of serum 25(OH)D might be  
53 underestimated because the blood sample of this study was collected in winter  
54 (December, January and February) when daylight and temperature was lower than that  
55 in summer. Fortunately, it might not affect the estimation of associations between SES  
56  
57  
58  
59  
60

1  
2  
3  
4 and vitamin D status since the collections of blood samples and interviews about  
5 exposure factors were conducted at the same time and thus the season could not be a  
6 confounding factor. Due to limited data, family assets and living conditions, which were  
7 also usual indicators of SES, were not included in our analysis. But considering family  
8 income and expenditure are thought to be a more reliable measure of SES<sup>28</sup> and can  
9 largely reflect family wealth, and because income, education, and occupation and  
10 employment are most widely used indicators of SES in epidemiological studies<sup>45</sup> than  
11 assets and living conditions, this limitation wouldn't change our conclusion. Also for  
12 limited data, we didn't get sunlight exposure of every participants, which could be an  
13 important mediating factor in our analysis. Furthermore, since there are no general  
14 standards of 25(OH)D measurements currently in China, the laboratory didn't  
15 participate in any vitamin D standardization program or use standardization of  
16 25(OH)D measurements, which might affect comparison between the present study and  
17 other studies.  
18  
19  
20  
21  
22  
23  
24  
25  
26  
27  
28  
29  
30

31 In conclusion, vitamin D deficiency/insufficiency was quite common among  
32 women at childbearing age in rural northern China. Lower SES was remarkably  
33 associated with increased risks of vitamin D deficiency/insufficiency. The underlying  
34 mechanisms could be nutritional and behavioral factors and utilization of public health  
35 services, but there might be other pathways needed to be detected. It's suggested that  
36 more efforts should be paid on improving nutritional status, health education of women  
37 at childbearing age and equalities of health care services to change their current state of  
38 vitamin D deficiency/insufficiency.  
39  
40  
41  
42  
43  
44  
45  
46  
47

48 **Contributors:** Dr. Shiqi Lin, Dr. Lifang Jiang and Dr. Yuan Zhang conducted the  
49 analysis and interpretation of the data, drafted the work, and reviewed and revised it.  
50 Dr Lijun Pei and Dr Xinming Song conceptualized and designed the study and the  
51 project where the data came from, coordinated and supervised data collection, and  
52 critically reviewed and revised the manuscript for important intellectual content. Dr.  
53 Jiajia Li and Dr. Jian Chai designed the data collection instruments, acquired data, and  
54  
55  
56  
57  
58  
59  
60

revised the paper critically for important intellectual content. All authors have approved the final manuscript as submitted and agreed to be accountable for all aspects of the work in ensuring that questions related to the accuracy or integrity of any part of the work were appropriately investigated and resolved.

**Funding:** This study was supported by National Key Research and Development Program of China (2018YFC1004303); National Natural Science Foundation of China (41871360); Danone Institute China Diet Nutrition Research & Communication Grant (DIC2015-05); and National Health Commission Key Laboratory of Birth Defects Prevention, Henan Province (ZD202002).

**Competing interests:** None declared.

**Patient consent for publication:** not required.

**Ethics approval:** The study was approved by the Institutional Review Board of Peking University Health Science Center (IRB00001052-08083).

**Data availability statement:** Data are available upon reasonable request. The datasets used and/or analyzed during the current study are available on reasonable request from the corresponding author.

## Reference

1. Schottker B, Ball D, Gellert C, Brenner H. Serum 25-hydroxyvitamin D levels and overall mortality. A systematic review and meta-analysis of prospective cohort studies. *Ageing Research Reviews*. 2013;12(2):708-718.
2. Zhang W, Stoecklin E, Eggersdorfer M. A glimpse of vitamin D status in Mainland China. *Nutrition*. 2013;29(7):953-957.
3. Lu Y, Liu M, Pei Y, Li J, Tian H, Cheng X, et al. Low levels of serum 25-hydroxyvitamin D and risk of metabolic syndrome in China. *Int J Clin Exp Med*. 2015;8(8):13790-13796.
4. Xiao Y, Wei L, Xiong XF, Yang M, Sun L. Association Between Vitamin D Status and Diabetic Complications in Patients With Type 2 Diabetes Mellitus: A Cross-Sectional Study in Hunan China. *Front Endocrinol*. 2020;11:11.
5. Jiang XJ, Peng M, Chen SH, Wu SL, Zhang WG. Vitamin D deficiency is associated with dyslipidemia: a cross-sectional study in 3788 subjects. *Curr Med Res Opin*. 2019;35(6):1059-1063.
6. Wang T, Sun HL, Ge HN, Liu XX, Yu F, Han H, et al. Association between vitamin D and risk of cardiovascular disease in Chinese rural population. *Plos One*. 2019;14(5):12.
7. Wang XR, Jiao XT, Xu MQ, Wang B, Li J, Yang F, et al. Effects of circulating vitamin D concentrations on emotion, behavior and attention: A cross-sectional study in preschool children

- with follow-up behavior experiments in juvenile mice. *J Affect Disord.* 2020;275:290-298.
8. Yao Y, Fu SH, Zhang H, Li N, Zhu Q, Zhang F, et al. The prevalence of depressive symptoms in Chinese longevous persons and its correlation with vitamin D status. *BMC Geriatr.* 2018;18:7.
  9. Chen YL, Liu DF, Zeng L, Xu HY, Jiang H, Yang R, et al. Effect of serum 25-hydroxyvitamin D levels on sperm quality and assisted reproductive technology outcomes for men of infertile Chinese couples. *Andrology.* 2020;8(5):1277-1286.
  10. Chen C, Zhai HL, Cheng J, Weng P, Chen Y, Li Q, et al. Causal Link Between Vitamin D and Total Testosterone in Men: A Mendelian Randomization Analysis. *J Clin Endocrinol Metab.* 2019;104(8):3148-3156.
  11. Wang Y, Li H, Zheng M, Wu Y, Zeng T, Fu J, et al. Maternal vitamin D deficiency increases the risk of adverse neonatal outcomes in the Chinese population: A prospective cohort study. *PLoS One.* 2018;13(4):e0195700.
  12. Al-Shafei AI, Rayis DA, Mohieldein AH, El-Gendy OA, Adam I. Maternal early pregnancy serum level of 25-Hydroxyvitamin D and risk of gestational diabetes mellitus. *Int J Gynecol Obstet.* 2010;104(1):108-117.
  13. Shin JS, Choi MY, Longtine MS, Nelson DM. Vitamin D effects on pregnancy and the placenta. *Placenta.* 2010;31(12):1027-1034.
  14. Leffelaar ER, Vrijkotte TGM, van Eijsden M. Maternal early pregnancy vitamin D status in relation to fetal and neonatal growth: results of the multi-ethnic Amsterdam Born Children and their Development cohort. *British Journal of Nutrition.* 2010;104(1):108-117.
  15. Wang S, Shen G, Jiang S, Xu H, Li M, Wang Z, et al. Nutrient Status of Vitamin D among Chinese Children. *Nutrients.* 2017;9(4):319.
  16. Wang J, Zhang JY, Wei R, Hu SP, Lin T, Lash GE, et al. Serum 25 hydroxyvitamin D status in 6-month-old infants in Guangzhou, China: A paired longitudinal follow up study. *Matern Child Nutr.* 2020;16(2):9.
  17. Wei F, Wang Z, Wang JJ, Xu HF, Zhou HZ. Serum vitamin D levels among children aged 0-12 years in the First Affiliated Hospital of Harbin Medical University, China. *J Public Health.* 2018;40(4):721-726.
  18. Holick MF. Vitamin D deficiency. *New England Journal of Medicine.* 2007;357(3):266-281.
  19. El-Hajj Fuleihan G, Nabulsi M, Choucair M, Salamoun M, Hajj Shahine C, Kizirian A, et al. Hypovitaminosis D in healthy schoolchildren. *Pediatrics.* 2001;107(4):E53.
  20. Javaid W, Sarwar A, Tariq H. PREVALENCE OF VITAMIN D DEFICIENCY AND INSUFFICIENCY IN THE PAEDIATRIC POPULATION OF PUNJAB, PAKISTAN. *Indo American Journal of Pharmaceutical Sciences.* 2019;6(6):11884-11888.
  21. Maddah M, Sharami SH, Neyestani TR. Vitamin D Insufficiency Among Postmenopausal Women in Urban and Rural Areas in Guilan, Northern Iran. *Journal of Nutrition For the Elderly.* 2009;28(4):386-393.
  22. Islam MZ, Lamberg-Allardt C, Karkkainen M, Outila T, Salamatullah Q, Shamim AA. Vitamin D deficiency: a concern in premenopausal Bangladeshi women of two socio-economic groups in rural and urban region. *European Journal of Clinical Nutrition.* 2002;56(1):51-56.
  23. Gannage-Yared MH, Maalouf G, Khalife S, Challita S, Yaghi Y, Ziade N, et al. Prevalence and predictors of vitamin D inadequacy amongst Lebanese osteoporotic women. *Br J Nutr.* 2009;101(4):487-491.
  24. Darmon N, Drewnowski A. Does social class predict diet quality. *The American Journal of*

- 1  
2  
3  
4  
5  
6  
7  
8  
9  
10  
11  
12  
13  
14  
15  
16  
17  
18  
19  
20  
21  
22  
23  
24  
25  
26  
27  
28  
29  
30  
31  
32  
33  
34  
35  
36  
37  
38  
39  
40  
41  
42  
43  
44  
45  
46  
47  
48  
49  
50  
51  
52  
53  
54  
55  
56  
57  
58  
59  
60
- Clinical Nutrition*. 2008;87(5):1107-1117.
25. Arneson WL, Arneson DL. Current Methods for Routine Clinical Laboratory Testing of Vitamin D Levels. *Laboratory Medicine*. 2013;44(1):e38-e42.
26. Holick M, Binkley N, Bischoff-Ferrari H, Gordon C, Hanley D, Heaney R, et al. Evaluation, Treatment, and Prevention of Vitamin D Deficiency: an Endocrine Society Clinical Practice Guideline. *The Journal of clinical endocrinology and metabolism*. 2011;96:1911-1930.
27. Vyas S, Kumaranayake L. Constructing socio-economic status indices: how to use principal components analysis. *Health Policy and Planning*. 2006;21(6):459-468.
28. McKenzie D. Measure Inequality With Asset Indicators. *Journal of Population Economics*. 2005;18:229-260.
29. Qin Y, Melse-Boonstra A, Pan X, Yuan B, Dai Y, Zhao J, et al. Anemia in relation to body mass index and waist circumference among chinese women. *Nutrition Journal*. 2013;12.
30. Ginde AA, Sullivan AF, Mansbach JM, Camargo Jr CA. Vitamin D insufficiency in pregnant and nonpregnant women of childbearing age in the United States. *American Journal of Obstetrics and Gynecology*. 2010;202(5):436.e431-436.e438.
31. Smith G, Wimalawansa SJ, Laillou A, Sophonneary P, Un S, Hong R, et al. High Prevalence of Vitamin D Deficiency in Cambodian Women: A Common Deficiency in a Sunny Country. *Nutrients*. 2016;8(5):290.
32. Liu X, Zhang Y, Mao D, Lu J, Chen J, Yang L, et al. Serum vitamin D levels of Chinese rural women of childbearing age in 2010-2012. *Wei sheng yan jiu = Journal of hygiene research*. 2017;46(3):367-372.
33. Hunt-Watts HJ, Cade JE, Hadley DM. Food and nutrient intake in low-income families: the archaeology of nutrition. *Proceedings of the Nutrition Society*. 2015;74(OCE5):E358-E358.
34. Calvo MS, Whiting SJ, Barton CN. Vitamin D fortification in the United States and Canada: current status and data needs. *Am J Clin Nutr*. 2004;80(6 Suppl):1710s-1716s.
35. Leger-Guist'hau J, Domingues-Faria C, Miolanne M, Peyrol F, Gerbaud L, Perreira B, et al. Low socio-economic status is a newly identified independent risk factor for poor vitamin D status in severely obese adults. *Journal of Human Nutrition and Dietetics*. 2017;30(2):203-215.
36. Kim JS. Factors Associated with Vitamin D Status Among Korean Female Adolescents. *Journal of Pediatric Nursing-Nursing Care of Children & Families*. 2019;44:E79-E83.
37. Rabenberg M, Scheidt-Nave C, Busch MA, Rieckmann N, Hintzpeter B, Mensink GBM. Vitamin D status among adults in Germany - results from the German Health Interview and Examination Survey for Adults (DEGS1). *Bmc Public Health*. 2015;15:15.
38. Wyskida M, Owczarek A, Szybalska A, Brzozowska A, Szczerbowska I, Wieczorowska-Tobis K, et al. Socio-economic determinants of vitamin D deficiency in the older Polish population: results from the PolSenior study. *Public Health Nutrition*. 2018;21(11):1995-2003.
39. Knapik A, Kocot K, Witek A, Jankowski M, Wroblewska-Czech A, Kowalska M, et al. Dietary supplementation usage by pregnant women in Silesia - population based study. *Ginekologia Polska*. 2018;89(9):506-512.
40. Novakovic R, Cavelaars A, Geelen A, Nikolic M, Altaba, II, Vinas BR, et al. Review Article Socio-economic determinants of micronutrient intake and status in Europe: a systematic review. *Public Health Nutrition*. 2014;17(5):1031-1045.
41. McCartney DMA, Younger KM, Walsh J, O'Neill M, Sheridan C, Kearney JM. Socio-economic differences in food group and nutrient intakes among young women in Ireland. *British Journal*

- 1  
2  
3  
4  
5  
6  
7  
8  
9  
10  
11  
12  
13  
14  
15  
16  
17  
18  
19  
20  
21  
22
- of Nutrition. 2013;110(11):2084-2097.
42. Centers for Disease Control and Prevention (CDC) NCfHSN. National health and nutrition examination survey data. In: Hyattsville MUDoHaHS, editor.2009.
43. Sathish P, Sajeethakumari R, Ramasamy P, Doraisami B, Muthusami M. Correlation between maternal and neonatal blood vitamin D levels and its effect on the newborn anthropometry. *International Journal of Reproduction, Contraception, Obstetrics and Gynecology*. 2016.
44. Liu X, Baylin A, Levy PD. Vitamin D deficiency and insufficiency among US adults: prevalence, predictors and clinical implications. *British Journal of Nutrition*. 2018;119(8):928-936.
45. Kaplan GA, Keil JE. Socioeconomic factors and cardiovascular disease: a review of the literature. *Circulation*. 1993;88(4 Pt 1):1973-1998.

23 Table 1 Serum 25(OH)D distribution among women at childbearing age

| Serum 25(OH)D*     | n    | %     | Medium(25%~75%)(ng/ml) |
|--------------------|------|-------|------------------------|
| Sufficient         | 369  | 32.06 | 40.20(35.10~47.50)     |
| Insufficient       | 232  | 20.16 | 24.35(22.03~26.88)     |
| Deficient          | 366  | 31.80 | 15.40(13.30~17.60)     |
| Severely deficient | 184  | 15.99 | 5.63(3.24~7.78)        |
| Total              | 1151 | 100   | 20.90(13.60~34.60)     |

24  
25  
26  
27  
28  
29  
30  
31  
32  
33 Serum 25(OH)D: Serum 25-hydroxyvitamin D.\* Sufficient ( $\geq 30$  ng/ml); Insufficient ( $\geq 20$  and  $< 30$   
34 ng/ml); Deficient ( $\geq 10$  and  $< 20$  ng/ml); Severely deficient ( $< 10$ ng/ml)

35  
36  
37  
38  
39 Table 2 Demographic, socio-economic, nutritional, behavioral and utilization of health service  
40 characteristics by vitamin D status

| Exposure variables           | 25(OH)D                | Sufficient     | Insufficient     | Deficient         | Severely       |
|------------------------------|------------------------|----------------|------------------|-------------------|----------------|
|                              | level                  | (n=369)        | (n=232)          | (n=366)           | deficient      |
|                              | medium                 | N              | N                | N                 | N              |
|                              | (25%~75%)              | (%)            | (%)              | (%)               | (%)            |
| <b>Demographic variables</b> |                        |                |                  |                   |                |
| <b>Age</b>                   |                        |                |                  |                   |                |
| < 28                         | 22.90<br>(14.40~37.20) | 222<br>(60.20) | 113<br>(48.71)   | 162<br>(44.26)    | 98<br>(53.26)  |
| 28-                          | 19.20<br>(13.20~31.10) | 147<br>(39.80) | 119<br>(51.29)** | 204<br>(55.74)*** | 86<br>(46.74)  |
| <b>BMI</b>                   |                        |                |                  |                   |                |
| < 24                         | 21.20<br>(13.60~35.30) | 244<br>(66.12) | 147<br>(63.36)   | 236<br>(64.48)    | 116<br>(63.04) |

|                                         |                        |                |                   |                   |                  |
|-----------------------------------------|------------------------|----------------|-------------------|-------------------|------------------|
| 24-                                     | 21.80<br>(14.40~34.50) | 92<br>(24.93)  | 58<br>(25.00)     | 85<br>(23.22)     | 44<br>(23.91)    |
| 28-                                     | 19.30<br>(12.80~31.25) | 33<br>(8.94)   | 27<br>(11.64)     | 45<br>(12.30)     | 24<br>(13.04)    |
| <b>Gravidity</b>                        |                        |                |                   |                   |                  |
| 0                                       | 22.90<br>(14.25~37.80) | 119<br>(32.25) | 53<br>(22.94)     | 78<br>(21.37)     | 51<br>(27.72)    |
| 1                                       | 23.20<br>(14.10~35.70) | 159<br>(43.09) | 97<br>(41.99)     | 132<br>(36.16)    | 61<br>(33.51)    |
| ≥2                                      | 18.40<br>(12.70~28.30) | 91<br>(24.66)  | 81<br>(35.06)**   | 155<br>(42.47)*** | 72<br>(39.13)**  |
| <b>History of chronic diseases</b>      |                        |                |                   |                   |                  |
| No                                      | 20.80<br>(13.55~34.65) | 327<br>(88.62) | 206<br>(88.79)    | 323<br>(88.25)    | 165<br>(89.67)   |
| Yes                                     | 21.35<br>(14.30~34.65) | 42<br>(11.38)  | 26<br>(11.21)     | 43<br>(11.75)     | 19<br>(10.33)    |
| <b>Socio-economic status</b>            |                        |                |                   |                   |                  |
| <b>Women's education</b>                |                        |                |                   |                   |                  |
| High school or above                    | 24.30<br>(14.90~38.40) | 126<br>(34.24) | 51<br>(21.98)     | 93<br>(25.48)     | 40<br>(21.74)    |
| Junior high or below                    | 20.15<br>(13.20~32.18) | 242<br>(65.76) | 181<br>(78.02)*   | 272<br>(74.52)*   | 144<br>(78.26)** |
| <b>Husband's education</b>              |                        |                |                   |                   |                  |
| High school or above                    | 22.40<br>(14.10~37.40) | 128<br>(34.69) | 58<br>(25.00)     | 103<br>(28.14)    | 51<br>(21.72)    |
| Junior high or below                    | 20.40<br>(13.33~32.45) | 241<br>(65.31) | 174<br>(75.00)*   | 263<br>(71.86)    | 133<br>(72.28)   |
| <b>Women's occupation</b>               |                        |                |                   |                   |                  |
| Others                                  | 20.40<br>(13.23~36.30) | 79<br>(21.41)  | 45<br>(19.40)     | 74<br>(20.22)     | 45<br>(24.46)    |
| Unemployed or famers                    | 21.10<br>(13.60~34.20) | 290<br>(78.59) | 187<br>(80.60)    | 292<br>(79.78)    | 139<br>(75.54)   |
| <b>Husband's occupation</b>             |                        |                |                   |                   |                  |
| Others                                  | 19.70<br>(12.70~33.20) | 210<br>(57.22) | 143<br>(62.17)    | 232<br>(63.74)    | 136<br>(73.91)   |
| Unemployed or famers                    | 23.60<br>(12.23~32.58) | 157<br>(42.78) | 87<br>(37.83)     | 132<br>(36.26)    | 48<br>(26.09)*** |
| <b>Household annual income (RMB)</b>    |                        |                |                   |                   |                  |
| ≥10000                                  | 23.00<br>(14.60~37.70) | 278<br>(75.34) | 122<br>(52.59)    | 223<br>(61.26)    | 86<br>(46.74)    |
| < 10000                                 | 18.50<br>(11.53~27.38) | 91<br>(24.66)  | 110<br>(47.41)*** | 141<br>(38.74)*** | 98<br>(53.26)*** |
| <b>Household income for expenditure</b> |                        |                |                   |                   |                  |
| Surplus                                 | 25.80                  | 189            | 65                | 110               | 55               |

|                                                     |                        |                |                   |                   |                   |
|-----------------------------------------------------|------------------------|----------------|-------------------|-------------------|-------------------|
|                                                     | (14.70~39.60)          | (51.22)        | (28.02)           | (30.14)           | (29.89)           |
|                                                     | 19.15                  | 180            | 167               | 255               | 129               |
| Inadequate or deficit                               | (13.05~29.58)          | (48.78)        | (71.98)***        | (69.86)***        | (70.11)***        |
| <b>SES index</b>                                    |                        |                |                   |                   |                   |
| High                                                | 24.50<br>(14.70~38.70) | 161<br>(43.99) | 57<br>(24.78)     | 107<br>(29.56)    | 47<br>(25.54)     |
| Middle                                              | 20.50<br>(13.30~35.10) | 124<br>(33.88) | 71<br>(30.87)     | 124<br>(34.25)    | 64<br>(34.78)     |
| Low                                                 | 19.90<br>(12.95~27.90) | 81<br>(22.13)  | 102<br>(44.35)*** | 131<br>(36.19)*** | 73<br>(39.67)***  |
| <b>Nutritional factors</b>                          |                        |                |                   |                   |                   |
| <b>Nutritional supplement</b>                       |                        |                |                   |                   |                   |
| No                                                  | 19.50<br>(13.10~31.15) | 231<br>(62.60) | 179<br>(77.16)    | 293<br>(80.05)    | 144<br>(78.26)    |
| Yes                                                 | 26.30<br>(14.88~40.33) | 138<br>(37.40) | 53<br>(22.84)***  | 73<br>(19.95)***  | 40<br>(21.74)***  |
| <b>Meat intake</b>                                  |                        |                |                   |                   |                   |
| ≥ once per week                                     | 21.70<br>(14.70~36.30) | 220<br>(59.62) | 130<br>(56.30)    | 213<br>(58.20)    | 84<br>(45.65)     |
| < once per week                                     | 19.80<br>(12.30~32.40) | 149<br>(40.38) | 102<br>(43.97)    | 153<br>(41.80)    | 100<br>(54.35)**  |
| <b>Fish intake</b>                                  |                        |                |                   |                   |                   |
| ≥ once per month                                    | 23.30<br>(14.70~36.80) | 91<br>(24.66)  | 39<br>(16.81)     | 81<br>(22.13)     | 24<br>(13.04)     |
| < once per month                                    | 20.40<br>(13.20~34.00) | 278<br>(75.34) | 193<br>(83.19)*   | 285<br>(77.87)    | 160<br>(86.96)**  |
| <b>Eggs intake</b>                                  |                        |                |                   |                   |                   |
| Everyday                                            | 24.15<br>(14.50~36.60) | 143<br>(38.75) | 60<br>(25.86)     | 102<br>(27.95)    | 49<br>(26.63)     |
| 4-6 times per week                                  | 23.70<br>(16.10~38.18) | 101<br>(27.37) | 71<br>(30.60)     | 82<br>(22.47)     | 27<br>(14.67)     |
| ≤ 3 times per week                                  | 17.90<br>(11.70~29.00) | 125<br>(33.88) | 101<br>(43.53)**  | 181<br>(49.59)*** | 108<br>(58.70)*** |
| <b>Milk or dairy products intake</b>                |                        |                |                   |                   |                   |
| ≥ 4 times per week                                  | 23.20<br>(14.70~37.90) | 89<br>(24.12)  | 26<br>(11.21)     | 68<br>(18.63)     | 24<br>(13.04)     |
| <4 times per week but<br>at least once per<br>month | 19.35<br>(12.40~32.30) | 96<br>(26.02)  | 73<br>(31.47)     | 118<br>(32.33)    | 59<br>(32.07)     |
| Almost never                                        | 21.15<br>(13.40~33.63) | 184<br>(49.86) | 133<br>(57.33)*** | 179<br>(49.04)    | 101<br>(54.89)**  |
| <b>Beans and soy products intake</b>                |                        |                |                   |                   |                   |
| Everyday                                            | 22.90<br>(15.10~34.60) | 103<br>(27.91) | 57<br>(24.57)     | 102<br>(27.95)    | 28<br>(15.22)     |



|                                                         |                        |                |                |                   |                  |
|---------------------------------------------------------|------------------------|----------------|----------------|-------------------|------------------|
| 4-6 times per week                                      | 23.80<br>(16.60~34.50) | 76<br>(20.60)  | 66<br>(28.45)  | 66<br>(18.08)     | 22<br>(11.96)    |
| 1-3 times per week                                      | 20.70<br>(12.48~35.13) | 92<br>(24.93)  | 61<br>(26.29)  | 93<br>(25.48)     | 56<br>(30.43)    |
| < once per week                                         | 17.90<br>(10.20~35.10) | 98<br>(26.56)  | 48<br>(20.69)  | 104<br>(28.49)    | 78<br>(42.39)*** |
| <b>Vegetables and fruits intake</b>                     |                        |                |                |                   |                  |
| Everyday                                                | 19.70<br>(12.90~33.30) | 256<br>(69.38) | 159<br>(68.53) | 273<br>(74.59)    | 152<br>(82.61)   |
| < once per day                                          | 23.90<br>(15.20~36.30) | 113<br>(30.62) | 73<br>(31.47)  | 93<br>(25.41)     | 32<br>(17.39)**  |
| <b>Behavioral factors</b>                               |                        |                |                |                   |                  |
| <b>Picky eating habits</b>                              |                        |                |                |                   |                  |
| No                                                      | 20.70<br>(13.63~33.30) | 323<br>(87.53) | 221<br>(95.26) | 346<br>(94.79)    | 164<br>(89.13)   |
| Yes                                                     | 27.10<br>(11.90~43.20) | 46<br>(12.47)  | 11<br>(4.74)** | 19<br>(5.21)**    | 20<br>(10.87)    |
| <b>Passive smoking</b>                                  |                        |                |                |                   |                  |
| No                                                      | 24.35<br>(14.75~37.13) | 171<br>(46.34) | 90<br>(38.79)  | 127<br>(34.70)    | 59<br>(32.07)    |
| Yes                                                     | 19.30<br>(12.80~32.30) | 198<br>(53.66) | 142<br>(61.21) | 239<br>(65.30)**  | 125<br>(67.93)** |
| <b>Physical exercise</b>                                |                        |                |                |                   |                  |
| No                                                      | 20.00<br>(13.30~33.80) | 298<br>(80.76) | 200<br>(86.21) | 329<br>(90.38)    | 161<br>(87.50)   |
| Yes                                                     | 27.65<br>(16.60~38.48) | 71<br>(19.24)  | 32<br>(13.79)  | 35<br>(9.62)***   | 23<br>(12.50)*   |
| <b>Utilization of health services</b>                   |                        |                |                |                   |                  |
| <b>Accept eugenic publicity</b>                         |                        |                |                |                   |                  |
| No                                                      | 18.40<br>(12.33~30.98) | 156<br>(42.74) | 115<br>(45.70) | 216<br>(59.50)    | 109<br>(59.24)   |
| Yes                                                     | 24.40<br>(15.00~37.40) | 209<br>(57.26) | 113<br>(49.56) | 147<br>(40.50)*** | 75<br>(40.76)*** |
| <b>Accept physical examination during the past year</b> |                        |                |                |                   |                  |
| No                                                      | 18.15<br>(11.78~29.60) | 176<br>(47.83) | 135<br>(58.44) | 246<br>(68.33)    | 149<br>(80.98)   |
| Yes                                                     | 27.20<br>(17.40~39.20) | 192<br>(52.17) | 96<br>(41.56)* | 114<br>(31.67)*** | 35<br>(19.02)*** |

RMB: the official currency of China; SES index, Socio-economic Status index; \* P<0.05; \*\*P<0.01; \*\*\*P<0.001

Table 3 Multivariate logistic analysis of association of vitamin D status with separate socio-economic status indicators and health service utilization variables

| <b>Vitamin D status</b>                 | <b>Insufficiency<br/>aOR(95%CI)*</b> | <b>Deficiency<br/>aOR(95%CI)*</b> | <b>Severe deficiency<br/>aOR(95%CI)*</b> |
|-----------------------------------------|--------------------------------------|-----------------------------------|------------------------------------------|
| <b>Socio-economic status</b>            |                                      |                                   |                                          |
| <b>Women's education</b>                |                                      |                                   |                                          |
| High school or above                    | 1.00                                 | 1.00                              | 1.00                                     |
| Junior high or below                    | 1.26(0.79~2.00)                      | 0.99(0.66~1.48)                   | 1.40(0.83~2.36)                          |
| <b>Husband's education</b>              |                                      |                                   |                                          |
| High school or above                    | 1.00                                 | 1.00                              | 1.00                                     |
| Junior high or below                    | 1.08(0.70~1.68)                      | 1.03(0.70~1.51)                   | 1.10(0.67~1.80)                          |
| <b>Women's occupation</b>               |                                      |                                   |                                          |
| Others                                  | 1.00                                 | 1.00                              | 1.00                                     |
| Unemployed or farmers                   | 1.58(0.96~2.61)                      | 1.43(0.91~2.24)                   | 1.39(0.81~2.40)                          |
| <b>Husband's occupation</b>             |                                      |                                   |                                          |
| Others                                  | 1.00                                 | 1.00                              | 1.00                                     |
| Unemployed or farmers                   | 1.12(0.77~1.65)                      | 1.03(0.73~1.46)                   | 1.53(0.97~2.41)                          |
| <b>Household annual income (RMB)</b>    |                                      |                                   |                                          |
| ≥ 10000                                 | 1.00                                 | 1.00                              | 1.00                                     |
| < 10000                                 | 2.10(1.41~3.14)                      | 1.58(1.09~2.29)                   | 2.79(1.78~4.38)                          |
| <b>Household income for expenditure</b> |                                      |                                   |                                          |
| Surplus                                 | 1.00                                 | 1.00                              | 1.00                                     |
| Inadequate or deficit                   | 1.66(1.08~2.54)                      | 1.81(1.26~2.62)                   | 1.36(0.85~2.16)                          |
| <b>Utilization of health services</b>   |                                      |                                   |                                          |
| <b>Accept eugenic publicity</b>         |                                      |                                   |                                          |

|                                                  |                 |                 |                 |
|--------------------------------------------------|-----------------|-----------------|-----------------|
| No                                               | 1.00            | 1.00            | 1.00            |
| Yes                                              | 1.01(0.67~1.52) | 0.82(0.57~1.19) | 1.12(0.70~1.77) |
| <b>Physical examination during the past year</b> |                 |                 |                 |
| No                                               | 1.00            | 1.00            | 1.00            |
| Yes                                              | 0.74(0.50~1.09) | 0.49(0.34~0.70) | 0.25(0.15~0.41) |

aOR: adjusted odds ratio; RMB: the official currency of China; \*Adjusted for women's age, gravidity, BMI, history of chronic diseases, nutritional supplement, meat intake, eggs intake, fish, milk or intake, vegetable and fruit intake, beans or bean products intake, milk or dairy products intake, picky eating habits, passive smoking and physical exercise.

Table 4 Multivariate logistic analysis of association of vitamin D status with socio-economic status index and health service utilization variables

| <b>Vitamin D status</b>                          | <b>Insufficiency<br/>aOR(95%CI)*</b> | <b>Deficiency<br/>aOR(95%CI)*</b> | <b>Severe deficiency<br/>aOR(95%CI)*</b> |
|--------------------------------------------------|--------------------------------------|-----------------------------------|------------------------------------------|
| <b>Socio-economic status</b>                     |                                      |                                   |                                          |
| <b>SES index</b>                                 |                                      |                                   |                                          |
| High                                             | 1.00                                 | 1.00                              | 1.00                                     |
| Middle                                           | 1.26(0.80~1.99)                      | 1.23(0.82~1.82)                   | 1.70(1.02~2.84)                          |
| Low                                              | 2.40(1.52~3.80)                      | 1.64(1.08~2.50)                   | 2.45(1.45~4.14)                          |
| <b>Utilization of health services</b>            |                                      |                                   |                                          |
| <b>Accept eugenic publicity</b>                  |                                      |                                   |                                          |
| No                                               | 1.00                                 | 1.00                              | 1.00                                     |
| Yes                                              | 0.94(0.64~1.40)                      | 0.77(0.54~1.11)                   | 1.10(0.70~1.72)                          |
| <b>Physical examination during the past year</b> |                                      |                                   |                                          |
| No                                               | 1.00                                 | 1.00                              | 1.00                                     |
| Yes                                              | 0.74(0.50~1.09)                      | 0.49(0.35~0.70)                   | 0.24(0.15~0.39)                          |

aOR: adjusted odds ratio; \*Adjusted for women's age, gravidity, BMI, history of chronic diseases, nutritional supplement, meat intake, eggs intake, fish, milk or intake, vegetable and fruit intake, beans or bean products intake, milk or dairy products intake, picky eating habits, passive smoking and physical exercise.

# Reporting checklist for case-control study.

Based on the STROBE case-control guidelines.

## Instructions to authors

Complete this checklist by entering the page numbers from your manuscript where readers will find each of the items listed below.

Your article may not currently address all the items on the checklist. Please modify your text to include the missing information. If you are certain that an item does not apply, please write "n/a" and provide a short explanation.

Upload your completed checklist as an extra file when you submit to a journal.

In your methods section, say that you used the STROBE case-control reporting guidelines, and cite them as:

von Elm E, Altman DG, Egger M, Pocock SJ, Gøtzsche PC, Vandenbroucke JP. The Strengthening the Reporting of Observational Studies in Epidemiology (STROBE) Statement: guidelines for reporting observational studies.

|                           |                     |                                                                                    | Page<br>Number |
|---------------------------|---------------------|------------------------------------------------------------------------------------|----------------|
| <b>Title and abstract</b> |                     |                                                                                    |                |
| Title                     | <a href="#">#1a</a> | Indicate the study's design with a commonly used term in the title or the abstract | 1              |
| Abstract                  | <a href="#">#1b</a> | Provide in the abstract an informative and balanced summary                        | 2              |

of what was done and what was found

## Introduction

Background / [#2](#) Explain the scientific background and rationale for the 3  
 rationale investigation being reported

Objectives [#3](#) State specific objectives, including any prespecified 4  
 hypotheses

## Methods

Study design [#4](#) Present key elements of study design early in the paper 4-6

Setting [#5](#) Describe the setting, locations, and relevant dates, including 4-5  
 periods of recruitment, exposure, follow-up, and data collection

Eligibility criteria [#6a](#) Give the eligibility criteria, and the sources and methods of 4-5  
 case ascertainment and control selection. Give the rationale  
 for the choice of cases and controls. For matched studies, give  
 matching criteria and the number of controls per case

Eligibility criteria [#6b](#) For matched studies, give matching criteria and the number of n/a  
 controls per case

[#7](#) Clearly define all outcomes, exposures, predictors, potential 6-8  
 confounders, and effect modifiers. Give diagnostic criteria, if  
 applicable

Data sources / [#8](#) For each variable of interest give sources of data and details of 6-8  
 measurement methods of assessment (measurement). Describe  
 comparability of assessment methods if there is more than one

group. Give information separately for cases and controls.

|    |                |                      |                                                                       |
|----|----------------|----------------------|-----------------------------------------------------------------------|
| 1  |                |                      |                                                                       |
| 2  |                |                      |                                                                       |
| 3  |                |                      |                                                                       |
| 4  | Bias           | <a href="#">#9</a>   | Describe any efforts to address potential sources of bias 13          |
| 5  |                |                      |                                                                       |
| 6  |                |                      |                                                                       |
| 7  | Study size     | <a href="#">#10</a>  | Explain how the study size was arrived at 4-5                         |
| 8  |                |                      |                                                                       |
| 9  |                |                      |                                                                       |
| 10 | Quantitative   | <a href="#">#11</a>  | Explain how quantitative variables were handled in the 6-8            |
| 11 |                |                      |                                                                       |
| 12 | variables      |                      | analyses. If applicable, describe which groupings were                |
| 13 |                |                      |                                                                       |
| 14 |                |                      | chosen, and why                                                       |
| 15 |                |                      |                                                                       |
| 16 |                |                      |                                                                       |
| 17 | Statistical    | <a href="#">#12a</a> | Describe all statistical methods, including those used to control 8-9 |
| 18 |                |                      |                                                                       |
| 19 | methods        |                      | for confounding                                                       |
| 20 |                |                      |                                                                       |
| 21 |                |                      |                                                                       |
| 22 |                |                      |                                                                       |
| 23 | Statistical    | <a href="#">#12b</a> | Describe any methods used to examine subgroups and n/a                |
| 24 |                |                      |                                                                       |
| 25 | methods        |                      | interactions                                                          |
| 26 |                |                      |                                                                       |
| 27 |                |                      |                                                                       |
| 28 | Statistical    | <a href="#">#12c</a> | Explain how missing data were addressed n/a                           |
| 29 |                |                      |                                                                       |
| 30 | methods        |                      |                                                                       |
| 31 |                |                      |                                                                       |
| 32 |                |                      |                                                                       |
| 33 | Statistical    | <a href="#">#12d</a> | If applicable, explain how matching of cases and controls was n/a     |
| 34 |                |                      |                                                                       |
| 35 | methods        |                      | addressed                                                             |
| 36 |                |                      |                                                                       |
| 37 |                |                      |                                                                       |
| 38 |                |                      |                                                                       |
| 39 | Statistical    | <a href="#">#12e</a> | Describe any sensitivity analyses n/a                                 |
| 40 |                |                      |                                                                       |
| 41 | methods        |                      |                                                                       |
| 42 |                |                      |                                                                       |
| 43 |                |                      |                                                                       |
| 44 | <b>Results</b> |                      |                                                                       |
| 45 |                |                      |                                                                       |
| 46 |                |                      |                                                                       |
| 47 | Participants   | <a href="#">#13a</a> | Report numbers of individuals at each stage of study—eg 9             |
| 48 |                |                      |                                                                       |
| 49 |                |                      | numbers potentially eligible, examined for eligibility, confirmed     |
| 50 |                |                      |                                                                       |
| 51 |                |                      | eligible, included in the study, completing follow-up, and            |
| 52 |                |                      |                                                                       |
| 53 |                |                      | analysed. Give information separately for cases and controls.         |
| 54 |                |                      |                                                                       |
| 55 |                |                      |                                                                       |
| 56 |                |                      |                                                                       |
| 57 | Participants   | <a href="#">#13b</a> | Give reasons for non-participation at each stage n/a                  |
| 58 |                |                      |                                                                       |
| 59 |                |                      |                                                                       |
| 60 |                |                      |                                                                       |

|    |                   |                      |                                                                   |      |
|----|-------------------|----------------------|-------------------------------------------------------------------|------|
| 1  | Participants      | <a href="#">#13c</a> | Consider use of a flow diagram                                    | n/a  |
| 2  |                   |                      |                                                                   |      |
| 3  |                   |                      |                                                                   |      |
| 4  | Descriptive data  | <a href="#">#14a</a> | Give characteristics of study participants (eg demographic,       | 9    |
| 5  |                   |                      | clinical, social) and information on exposures and potential      |      |
| 6  |                   |                      | confounders. Give information separately for cases and            |      |
| 7  |                   |                      | controls                                                          |      |
| 8  |                   |                      |                                                                   |      |
| 9  |                   |                      |                                                                   |      |
| 10 |                   |                      |                                                                   |      |
| 11 |                   |                      |                                                                   |      |
| 12 |                   |                      |                                                                   |      |
| 13 |                   |                      |                                                                   |      |
| 14 | Descriptive data  | <a href="#">#14b</a> | Indicate number of participants with missing data for each        | n/a  |
| 15 |                   |                      | variable of interest                                              |      |
| 16 |                   |                      |                                                                   |      |
| 17 |                   |                      |                                                                   |      |
| 18 |                   |                      |                                                                   |      |
| 19 | Outcome data      | <a href="#">#15</a>  | Report numbers in each exposure category, or summary              | 9    |
| 20 |                   |                      | measures of exposure. Give information separately for cases       |      |
| 21 |                   |                      | and controls                                                      |      |
| 22 |                   |                      |                                                                   |      |
| 23 |                   |                      |                                                                   |      |
| 24 |                   |                      |                                                                   |      |
| 25 |                   |                      |                                                                   |      |
| 26 |                   |                      |                                                                   |      |
| 27 | Main results      | <a href="#">#16a</a> | Give unadjusted estimates and, if applicable, confounder-         | 9-10 |
| 28 |                   |                      | adjusted estimates and their precision (eg, 95% confidence        |      |
| 29 |                   |                      | interval). Make clear which confounders were adjusted for and     |      |
| 30 |                   |                      | why they were included                                            |      |
| 31 |                   |                      |                                                                   |      |
| 32 |                   |                      |                                                                   |      |
| 33 |                   |                      |                                                                   |      |
| 34 |                   |                      |                                                                   |      |
| 35 |                   |                      |                                                                   |      |
| 36 |                   |                      |                                                                   |      |
| 37 | Main results      | <a href="#">#16b</a> | Report category boundaries when continuous variables were         | 6-8  |
| 38 |                   |                      | categorized                                                       |      |
| 39 |                   |                      |                                                                   |      |
| 40 |                   |                      |                                                                   |      |
| 41 |                   |                      |                                                                   |      |
| 42 | Main results      | <a href="#">#16c</a> | If relevant, consider translating estimates of relative risk into | n/a  |
| 43 |                   |                      | absolute risk for a meaningful time period                        |      |
| 44 |                   |                      |                                                                   |      |
| 45 |                   |                      |                                                                   |      |
| 46 |                   |                      |                                                                   |      |
| 47 |                   |                      |                                                                   |      |
| 48 | Other analyses    | <a href="#">#17</a>  | Report other analyses done—e.g., analyses of subgroups and        | n/a  |
| 49 |                   |                      | interactions, and sensitivity analyses                            |      |
| 50 |                   |                      |                                                                   |      |
| 51 |                   |                      |                                                                   |      |
| 52 |                   |                      |                                                                   |      |
| 53 | <b>Discussion</b> |                      |                                                                   |      |
| 54 |                   |                      |                                                                   |      |
| 55 |                   |                      |                                                                   |      |
| 56 | Key results       | <a href="#">#18</a>  | Summarise key results with reference to study objectives          | 9-10 |
| 57 |                   |                      |                                                                   |      |
| 58 |                   |                      |                                                                   |      |
| 59 |                   |                      |                                                                   |      |
| 60 |                   |                      |                                                                   |      |

|    |                          |                     |                                                                      |       |
|----|--------------------------|---------------------|----------------------------------------------------------------------|-------|
| 1  | Limitations              | <a href="#">#19</a> | Discuss limitations of the study, taking into account sources of     | 13-14 |
| 2  |                          |                     | potential bias or imprecision. Discuss both direction and            |       |
| 3  |                          |                     | magnitude of any potential bias.                                     |       |
| 4  |                          |                     |                                                                      |       |
| 5  |                          |                     |                                                                      |       |
| 6  |                          |                     |                                                                      |       |
| 7  |                          |                     |                                                                      |       |
| 8  |                          |                     |                                                                      |       |
| 9  | Interpretation           | <a href="#">#20</a> | Give a cautious overall interpretation considering objectives,       | 10-11 |
| 10 |                          |                     | limitations, multiplicity of analyses, results from similar studies, |       |
| 11 |                          |                     | and other relevant evidence.                                         |       |
| 12 |                          |                     |                                                                      |       |
| 13 |                          |                     |                                                                      |       |
| 14 |                          |                     |                                                                      |       |
| 15 |                          |                     |                                                                      |       |
| 16 | Generalisability         | <a href="#">#21</a> | Discuss the generalisability (external validity) of the study        | n/a   |
| 17 |                          |                     | results                                                              |       |
| 18 |                          |                     |                                                                      |       |
| 19 |                          |                     |                                                                      |       |
| 20 |                          |                     |                                                                      |       |
| 21 |                          |                     |                                                                      |       |
| 22 | <b>Other Information</b> |                     |                                                                      |       |
| 23 |                          |                     |                                                                      |       |
| 24 |                          |                     |                                                                      |       |
| 25 | Funding                  | <a href="#">#22</a> | Give the source of funding and the role of the funders for the       | 14    |
| 26 |                          |                     | present study and, if applicable, for the original study on which    |       |
| 27 |                          |                     | the present article is based                                         |       |
| 28 |                          |                     |                                                                      |       |
| 29 |                          |                     |                                                                      |       |
| 30 |                          |                     |                                                                      |       |
| 31 |                          |                     |                                                                      |       |
| 32 |                          |                     |                                                                      |       |

33 The STROBE checklist is distributed under the terms of the Creative Commons Attribution License  
34 CC-BY. This checklist was completed on 29. June 2020 using <https://www.goodreports.org/>, a tool  
35 made by the [EQUATOR Network](#) in collaboration with [Penelope.ai](#)  
36  
37  
38  
39  
40  
41  
42  
43  
44  
45  
46  
47  
48  
49  
50  
51  
52  
53  
54  
55  
56  
57  
58  
59  
60
